# Supplementary material for: Transition-metal-free sulfonylations of methylthiolated alkynones to synthesize 3-sulfonylated thioflavones
Source: Royal Society of Chemistry journal article supplement (doi:10.1039/d0nj03386c), 2020-01-01
Supplement: d0nj03386c1.pdf [file d0nj03386c1.pdf]

## Supporting Information

### Transition-Metal-Free Sulfonylation of Methylthiolated Alkynones to Synthesize 3-Sulfonylated Thioflavones

Zhi-Wen Feng,<sup>a,#</sup> Jing Li,<sup>a,#</sup> Yu-Qin Jiang,<sup>a</sup> Yu Tian,<sup>a</sup> Gui-Qing Xu,<sup>a</sup> Xin Shi,<sup>a</sup> Qing-Jie Ding,<sup>a</sup> Wei Li,<sup>a</sup> Chun-Hua Ma,<sup>a\*</sup> and Bing Yu<sup>b\*</sup>

<sup>a</sup> Collaborative Innovation Centre of Henan Province for Green Manufacturing of Fine Chemicals, Key Laboratory of Green Chemical Media and Reactions, Ministry of Education, Henan Engineering Research Centre of Chiral Hydroxyl Pharmaceutical, Henan Engineering Laboratory of Chemical Pharmaceutical and Biomedical Materials, School of Chemistry and Chemical Engineering, Henan Normal University, Xixiang 453007, China. E-mail: xiaoma3625@126.com

<sup>b</sup> Green Catalysis Centre, College of Chemistry, Zhengzhou University. Zhengzhou 450001, China. E-mail: bingyu@zzu.edu.cn

# Zhi-Wen Feng and Jing Li contributed equally.

### Table of Contents

|                                            |     |
|--------------------------------------------|-----|
| 1. General information.....                | S2  |
| 2. Experimental procedures.....            | S2  |
| 3. Characterization of compounds.....      | S4  |
| 4. NMR copies of products.....             | S16 |
| 5. X-ray crystallographic data for 3a..... | S46 |

## 1. General information

### 1.1 Materials and instruments

Tert-butyl hydroperoxide (TBHP), sodium iodide (NaI) were purchased from Tansoole, Shanghai, China. Other reagents were purchased from Bidepharm.com. Unless otherwise stated, all commercially available reagents were directly used without further purification. All solvents were purified by standard methods prior to use. All reactions were monitored by thin layer chromatography (TLC), and column chromatography was carried out on 100-200 mesh of silica gel purchased from Damas-beta. All nuclear magnetic resonance (NMR) spectra were recorded on a Bruker Avance 600 MHz in CDCl<sub>3</sub> at room temperature (20 ± 3 °C), using tetramethylsilane as internal standard. High resolution mass spectra (HRMS) were conducted on a 3000-mass spectrometer, using Bruker compact Qq TOF MS/MS system with the ESI technique.

## 2. Experimental procedures

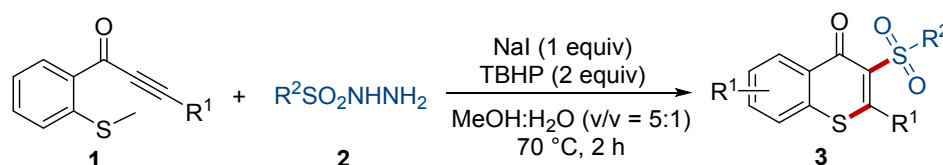

**General experimental procedures for 3-sulfonylated thioflavones:** In a 25 mL flask, 1-(2-(methylthio)phenyl)-3-phenylprop-2-yn-1-ones **1** (0.2 mmol) and arylsulfonyl hydrazides **2** (3.0 equiv) were dissolved in MeOH/H<sub>2</sub>O (v/v = 5/1) (2 mL), and then TBHP (2.0 equiv), NaI (1.0 equiv) were added. The mixture was stirred at 70 °C for 2 h. After the reaction was completed, the solvent was evaporated under vacuum. Then, the residue was quenched with water (5 mL), and then the ethyl acetate (15 mL) was added three times for extraction. The combined organic layers were dried over anhydrous Na<sub>2</sub>SO<sub>4</sub>. The residue was purified by silica gel chromatography (petroleum ether/ethyl acetate = 6/1) to afford the desired product.

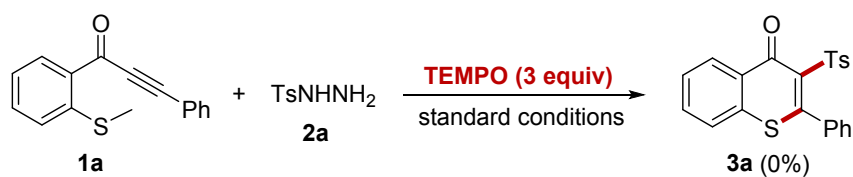

**Control experiments with TEMPO:** In a 25 mL flask, 1-(2-(methylthio)phenyl)-3-phenylprop-2-yn-1-one (**1a**) (0.2 mmol) and TsNHNH<sub>2</sub> (**2a**) (3.0 equiv) were dissolved in MeOH/H<sub>2</sub>O (v/v = 5/1) (2 mL) and TBHP (3.0 equiv), NaI (1.0 equiv) were added. Afterward, ((2,2,6,6-tetramethylpiperidin-1-yl)oxidanyl) (TEMPO, 3.0 equiv) was added in the mixture. The mixture was allowed to stir at 70 °C for 2h. After the reaction was completed, the solvent was evaporated under vacuum. Then, the residue was quenched with water (5 mL), and then the ethyl acetate (15 mL) was added three times for extraction. The reaction mixture was tested using HRMS and product **4** was successfully detected. Furthermore, product **4** was isolated in 18% yield.

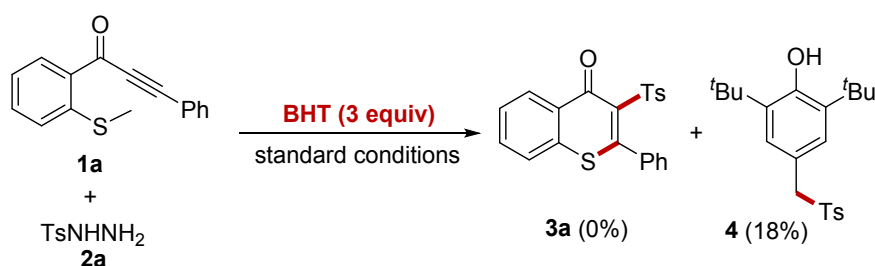

**Control experiments with BHT:** In a 25 mL flask, 1-(2-(methylthio)phenyl)-3-phenylprop-2-yn-1-one (**1a**) (0.2 mmol) and TsNHNH<sub>2</sub> (**2a**) (3.0 equiv) were dissolved in MeOH/H<sub>2</sub>O (v/v = 5/1) (2 mL) and TBHP (3.0 equiv), NaI (1.0 equiv) were added. Afterward, (2,6-ditert-butyl-4-methylphenol) (BHT, 3.0 equiv) was added in the mixture. The mixture was allowed to stir at 70 °C for 2 h. After the reaction was completed, the solvent was evaporated under vacuum. Then, the residue was quenched with water (5 mL), and then the ethyl acetate (15 mL) was added three times for extraction. The reaction mixture was tested using HRMS and no desired product was detected.

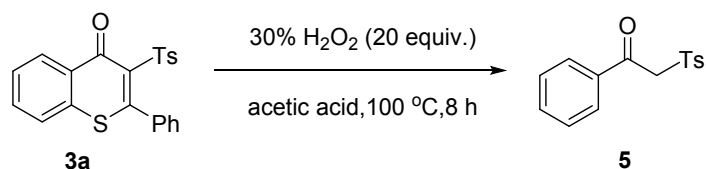

**Transformation of the product 3a:** In a 25 mL flask, 2-phenyl-3-tosyl-4H-thiochromen-4-one (**3a**) (0.2 mmol) was dissolved in acetic acid (5 mL), and then 30% H<sub>2</sub>O<sub>2</sub> (20 equiv) was added. The mixture was refluxed at 100 °C for 8 h. After the reaction was completed, the solvent was quenched with saturated sodium carbonate solution (8 mL). Then, the ethyl acetate (15 mL) was added three times for extraction. The combined organic layers were dried over anhydrous Na<sub>2</sub>SO<sub>4</sub>. The residue was purified by silica gel chromatography (petroleum ether/ethyl acetate = 7/1) to afford product **5** in 43% yield.

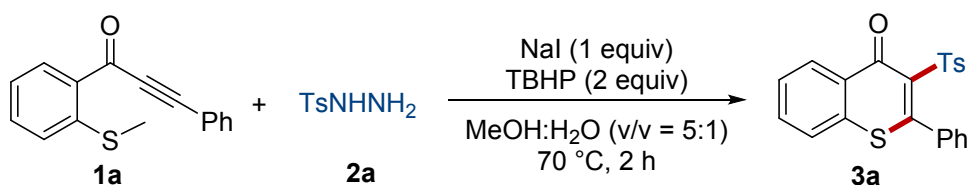

**Gram-scale synthesis of 3a:** In a 250 mL flask, 1-(2-(methylthio)phenyl)-3-phenylprop-2-yn-1-one (**1a**) (4 mmol) and TsNHNH<sub>2</sub> (**2a**) (3.0 equiv) were dissolved in MeOH/H<sub>2</sub>O (v/v = 5/1) (40 mL), and then TBHP (2.0 equiv), NaI (1.0 equiv) were added. The mixture was stirred at 70 °C for 2 h. After the reaction was completed, the solvent was evaporated under vacuum. Then, the residue was quenched with water (50 mL), and then the ethyl acetate (150 mL) was added three times for extraction. The combined organic layers were dried over anhydrous Na<sub>2</sub>SO<sub>4</sub>. The residue was purified by silica gel chromatography (petroleum ether/ethyl acetate = 6/1) to afford product **3a** in 33% yield.

### 3. Characterization of compounds

*2-phenyl-3-tosyl-4H-thiochromen-4-one (3a)*

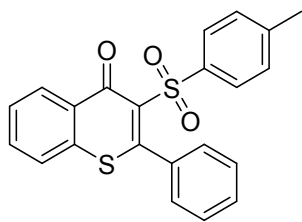

66.6 mg, 85%; White solid, m.p. 171-172°C; <sup>1</sup>H NMR (600 MHz, CDCl<sub>3</sub>) δ 8.37 (d, *J* = 7.8 Hz, 1H), 7.92 (d, *J* = 8.4 Hz, 2H), 7.63 (t, *J* = 8.4 Hz, 1H), 7.56-7.49 (m, 7H), 7.27 (d, *J* = 8.4 Hz, 2H), 2.39 (s, 3H). <sup>13</sup>C NMR (150 MHz, CDCl<sub>3</sub>) δ 176.2, 162.5, 144.0, 138.9, 135.8, 134.8, 133.2, 132.7, 131.8, 130.4, 129.2, 129.1, 128.9, 128.8, 128.2, 128.1, 125.4, 21.7. HRMS Calcd for C<sub>22</sub>H<sub>17</sub>O<sub>3</sub>S<sub>2</sub> [M + H]<sup>+</sup>: m/z 393.0614, Found: 393.0604.

*2-(p-tolyl)-3-tosyl-4H-thiochromen-4-one (3b)*

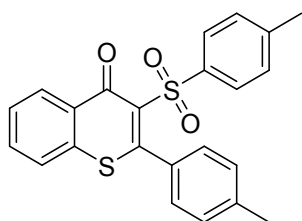

56.8 mg, 70%; White solid, m.p. 179-180 °C; <sup>1</sup>H NMR (600 MHz, CDCl<sub>3</sub>) δ 8.36 (d, *J* = 7.8 Hz, 1H), 7.92 (d, *J* = 7.8 Hz, 2H), 7.63 (t, *J* = 7.8 Hz, 1H), 7.52 (t, *J* = 7.8 Hz, 2H), 7.46 (d, *J* = 8.4 Hz, 2H), 7.32 (d, *J* = 7.8 Hz, 2H), 7.27 (d, *J* = 7.8 Hz, 2H), 2.45 (s, 3H), 2.39 (s, 3H). <sup>13</sup>C NMR (150 MHz, CDCl<sub>3</sub>) δ 176.4, 162.8, 144.0, 140.9, 139.1, 136.0, 133.3, 132.6, 132.1, 132.0, 129.4, 129.2, 129.0, 128.9, 128.8, 128.2, 125.4, 21.8, 21.7. HRMS Calcd for C<sub>23</sub>H<sub>19</sub>O<sub>3</sub>S<sub>2</sub> [M + H]<sup>+</sup>: m/z 407.0770, Found: 407.0765.

*2-(4-ethylphenyl)-3-tosyl-4H-thiochromen-4-one (3c)*

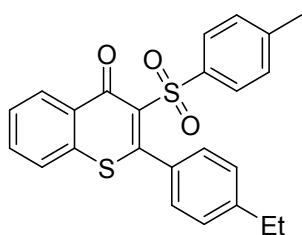

58.8 mg, 70%; White solid, m.p. 158-159 °C; <sup>1</sup>H NMR (600 MHz, CDCl<sub>3</sub>) δ 8.36 (d, *J* = 7.8 Hz, 1H), 7.91 (d, *J* = 8.4 Hz, 2H), 7.64 (t, *J* = 6.0 Hz, 1H), 7.53-7.48 (m, 4H),

7.34 (d,  $J = 7.8$  Hz, 2H), 7.27 (d,  $J = 7.8$  Hz, 2H), 2.76 (q,  $J = 15.0, 7.2$  Hz, 2H), 2.39 (s, 3H), 1.31 (t,  $J = 7.8$  Hz, 3H).  $^{13}\text{C}$  NMR (150 MHz,  $\text{CDCl}_3$ )  $\delta$  176.4, 162.8, 146.9, 144.0, 139.1, 136.0, 133.2, 132.6, 132.2, 132.0, 129.4, 129.2, 128.9, 128.8, 128.3, 127.8, 125.4, 28.9, 21.8, 15.2. HRMS Calcd for  $\text{C}_{24}\text{H}_{21}\text{O}_3\text{S}_2$   $[\text{M} + \text{H}]^+$ :  $m/z$  421.0927, Found: 421.0933.

*2-(4-(tert-butyl)phenyl)-3-tosyl-4H-thiochromen-4-one (3d)*

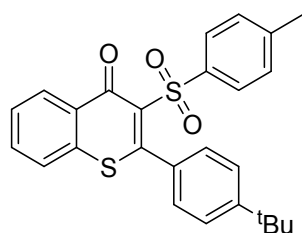

79.8 mg, 89%; White solid, m.p. 238-239°C;  $^1\text{H}$  NMR (600 MHz,  $\text{CDCl}_3$ )  $\delta$  8.36 (d,  $J = 8.4$  Hz, 1H), 7.91 (d,  $J = 7.8$  Hz, 2H), 7.64 (t,  $J = 7.2$  Hz, 1H), 7.54-7.50 (m, 6H), 7.27 (d,  $J = 1.2$  Hz, 2H), 2.40 (s, 3H), 1.39 (s, 9H).  $^{13}\text{C}$  NMR (150 MHz,  $\text{CDCl}_3$ )  $\delta$  176.4, 162.9, 153.9, 143.9, 139.2, 136.1, 133.1, 132.6, 132.0, 131.9, 129.4, 129.1, 128.8, 128.7, 128.2, 125.4, 125.3, 35.1, 31.4, 21.8. HRMS Calcd for  $\text{C}_{26}\text{H}_{25}\text{O}_3\text{S}_2$   $[\text{M} + \text{H}]^+$ :  $m/z$  449.1240, Found: 449.1220.

*2-(4-methoxyphenyl)-3-tosyl-4H-thiochromen-4-one (3e)*

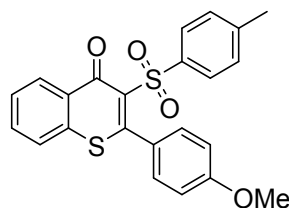

66.7 mg, 79%; White solid, m.p. 183-184°C;  $^1\text{H}$  NMR (400 MHz,  $\text{CDCl}_3$ )  $\delta$  8.34 (d,  $J = 8.4$  Hz, 1H), 7.90 (d,  $J = 8.0$  Hz, 2H), 7.63 (t,  $J = 7.2$  Hz, 1H), 7.55-7.50 (m, 4H), 7.26 (d,  $J = 3.6$  Hz, 2H), 7.02 (d,  $J = 8.4$  Hz, 2H), 3.89 (s, 3H), 2.39 (s, 3H).  $^{13}\text{C}$  NMR (150 MHz,  $\text{CDCl}_3$ )  $\delta$  176.5, 162.5, 161.7, 143.9, 139.2, 136.0, 133.2, 132.6, 132.1, 130.1, 129.4, 129.1, 128.9, 128.7, 127.0, 125.3, 113.9, 55.6, 21.8. HRMS Calcd for  $\text{C}_{23}\text{H}_{19}\text{O}_4\text{S}_2$   $[\text{M} + \text{H}]^+$ :  $m/z$  423.0719, Found: 423.0710.

*2-(4-fluorophenyl)-3-tosyl-4H-thiochromen-4-one (3f)*

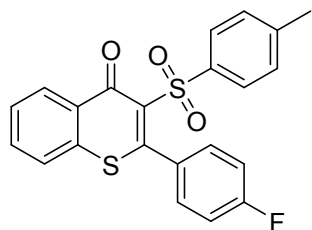

64.1 mg, 78%; White solid, m.p. 221-222 °C;  $^1\text{H}$  NMR (600 MHz,  $\text{CDCl}_3$ )  $\delta$  8.35 (d,  $J$  = 8.4 Hz, 1H), 7.90 (d,  $J$  = 8.4 Hz, 2H), 7.64 (t,  $J$  = 7.8 Hz, 1H), 7.56-7.51 (m, 4H), 7.27 (d,  $J$  = 8.4 Hz, 2H), 7.24 (t,  $J$  = 8.4 Hz, 2H), 2.39 (s, 3H).  $^{13}\text{C}$  NMR (150 MHz,  $\text{CDCl}_3$ )  $\delta$  176.2, 164.1 (d,  $J$  = 249.0 Hz), 161.2, 144.2, 138.8, 135.6, 133.6, 132.7, 131.9, 130.8 (d,  $J$  = 4.5 Hz), 130.3 (d,  $J$  = 9.0 Hz), 129.4, 129.2, 128.9, 128.8, 125.4, 115.6 (d,  $J$  = 22.5 Hz), 21.7.  $^{19}\text{F}$  NMR (564 MHz,  $\text{CDCl}_3$ )  $\delta$  -109.6. HRMS Calcd for  $\text{C}_{22}\text{H}_{16}\text{FO}_3\text{S}_2$  [ $\text{M} + \text{H}$ ] $^+$ : m/z 411.0519, Found: 411.0509.

*2-(4-chlorophenyl)-3-tosyl-4H-thiochromen-4-one (3g)*

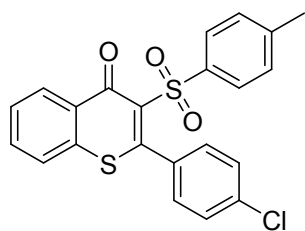

52.9 mg, 62%; White solid, m.p. 204-205°C;  $^1\text{H}$  NMR (600 MHz,  $\text{CDCl}_3$ )  $\delta$  8.37 (d,  $J$  = 8.4 Hz, 1H), 7.91 (d,  $J$  = 8.4 Hz, 2H), 7.66 (t,  $J$  = 7.2 Hz, 1H), 7.56-7.49 (m, 6H), 7.28 (d,  $J$  = 7.8 Hz, 2H), 2.40 (s, 3H).  $^{13}\text{C}$  NMR (150 MHz,  $\text{CDCl}_3$ )  $\delta$  176.1, 161.0, 144.3, 138.8, 136.9, 135.6, 133.6, 133.3, 132.8, 131.9, 129.6, 129.5, 129.3, 129.0, 128.9, 128.7, 125.4, 21.8. HRMS Calcd for  $\text{C}_{22}\text{H}_{16}\text{ClO}_3\text{S}_2$  [ $\text{M} + \text{H}$ ] $^+$ : m/z 427.0224, Found: 427.0224.

*2-(4-bromophenyl)-3-tosyl-4H-thiochromen-4-one (3h)*

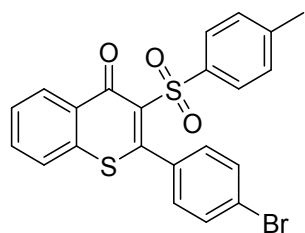

89.3 mg, 95%; White solid, m.p. 189-190°C;  $^1\text{H}$  NMR (600 MHz,  $\text{CDCl}_3$ )  $\delta$  8.38 (d,  $J$

= 8.4 Hz, 1H), 7.91 (d,  $J = 7.8$  Hz, 2H), 7.67-7.65 (m, 3H), 7.56-7.52 (m, 2H), 7.42 (d,  $J = 8.4$  Hz, 2H), 7.28 (d,  $J = 8.4$  Hz, 2H), 2.40 (s, 3H).  $^{13}\text{C}$  NMR (150 MHz,  $\text{CDCl}_3$ )  $\delta$  176.1, 161.0, 144.3, 138.8, 135.6, 133.8, 133.6, 132.8, 131.9, 131.6, 129.8, 129.5, 129.3, 129.0, 128.9, 125.4, 125.1, 21.8. HRMS Calcd for  $\text{C}_{22}\text{H}_{15}\text{BrNaO}_3\text{S}_2$   $[\text{M} + \text{Na}]^+$ :  $m/z$  492.9536, Found: 492.9514.

*3-tosyl-2-(4-(trifluoromethyl)phenyl)-4H-thiochromen-4-one (3i)*

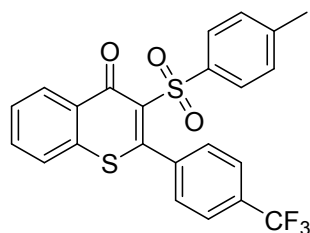

81.9 mg, 89%; White solid, m.p. 242-243 °C;  $^1\text{H}$  NMR (600 MHz,  $\text{CDCl}_3$ )  $\delta$  8.40 (d,  $J = 7.8$  Hz, 1H), 7.91 (d,  $J = 7.8$  Hz, 2H), 7.78 (d,  $J = 7.8$  Hz, 2H), 7.69-7.65 (m, 3H), 7.58-7.53 (m, 2H), 7.29 (d,  $J = 7.8$  Hz, 2H), 2.40 (s, 3H).  $^{13}\text{C}$  NMR (150 MHz,  $\text{CDCl}_3$ )  $\delta$  176.0, 160.4, 144.5, 138.5, 135.4, 133.7, 132.9, 132.3 (q,  $J = 31.5$  Hz), 131.9, 129.5, 129.3, 129.2, 129.0, 128.6, 125.5, 125.4 (q,  $J = 3.0$  Hz), 123.9 (q,  $J = 271.5$  Hz), 21.8.  $^{19}\text{F}$  NMR (564 MHz,  $\text{CDCl}_3$ )  $\delta$  -62.8. HRMS Calcd for  $\text{C}_{23}\text{H}_{16}\text{F}_3\text{O}_3\text{S}_2$   $[\text{M} + \text{H}]^+$ :  $m/z$  461.0487, Found: 461.0481.

*4-(4-oxo-3-tosyl-4H-thiochromen-2-yl)benzotrile (3j)*

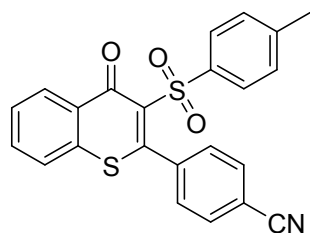

53.4 mg, 64%; White solid, m.p. 240-242°C;  $^1\text{H}$  NMR (600 MHz,  $\text{CDCl}_3$ )  $\delta$  8.40 (d,  $J = 8.4$  Hz, 1H), 7.90 (d,  $J = 8.4$  Hz, 2H), 7.81 (d,  $J = 7.8$  Hz, 2H), 7.69-7.66 (m, 3H), 7.59-7.53 (m, 2H), 7.30 (d,  $J = 7.8$  Hz, 2H), 2.41 (s, 3H).  $^{13}\text{C}$  NMR (150 MHz,  $\text{CDCl}_3$ )  $\delta$  175.8, 159.6, 144.7, 139.4, 138.3, 135.2, 133.8, 133.0, 132.1, 131.8, 129.6, 129.4, 129.3, 129.1, 128.9, 125.5, 118.2, 114.2, 21.82. HRMS Calcd for  $\text{C}_{23}\text{H}_{16}\text{NO}_3\text{S}_2$   $[\text{M} + \text{H}]^+$ :  $m/z$  418.0566, Found: 418.0557.



*2-(m-tolyl)-3-tosyl-4H-thiochromen-4-one (3k)*

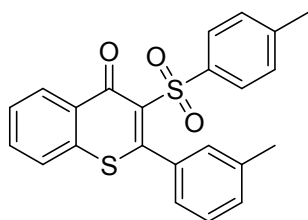

66.6 mg, 82%; White solid, m.p. 170-171°C; <sup>1</sup>H NMR (600 MHz, CDCl<sub>3</sub>) δ 8.38 (d, *J* = 7.8 Hz, 1H), 7.93 (d, *J* = 8.4 Hz, 2H), 7.64 (t, *J* = 7.8 Hz, 1H), 7.53 (q, *J* = 15.6, 7.8 Hz, 2H), 7.40 (t, *J* = 7.8 Hz, 1H), 7.37-7.32 (m, 3H), 7.27 (d, *J* = 7.8 Hz, 2H), 2.46 (s, 3H), 2.40 (s, 3H). <sup>13</sup>C NMR (150 MHz, CDCl<sub>3</sub>) δ 176.4, 162.8, 144.0, 139.1, 138.0, 135.9, 134.9, 133.2, 132.6, 132.0, 131.3, 129.4, 129.2, 129.0, 128.8, 128.7, 128.2, 125.5, 125.4, 21.8, 21.6. HRMS Calcd for C<sub>23</sub>H<sub>19</sub>O<sub>3</sub>S<sub>2</sub> [M + H]<sup>+</sup>: m/z 407.0770, Found: 407.0766.

*2-(2-bromophenyl)-3-tosyl-4H-thiochromen-4-one (3l)*

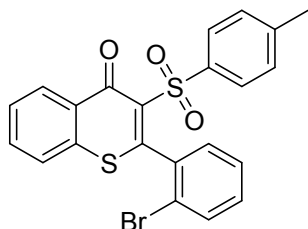

51.7 mg, 55%; White solid, m.p. 150-151 °C; <sup>1</sup>H NMR (600 MHz, CDCl<sub>3</sub>) δ 8.43 (d, *J* = 8.4 Hz, 1H), 8.03 (d, *J* = 8.4 Hz, 2H), 7.73 (d, *J* = 7.8 Hz, 1H), 7.65 (t, *J* = 7.8 Hz, 1H), 7.56-7.53 (m, 2H), 7.49 (t, *J* = 3.0 Hz, 2H), 7.40-7.37 (m, 1H), 7.29 (d, *J* = 4.2 Hz, 2H), 2.40 (s, 3H). <sup>13</sup>C NMR (150 MHz, CDCl<sub>3</sub>) δ 175.9, 160.6, 144.3, 138.7, 135.9, 135.6, 133.9, 133.0, 132.7, 131.9, 131.3, 129.8, 129.5, 129.3, 129.1, 128.9, 127.3, 125.6, 121.8, 21.8. HRMS Calcd for C<sub>22</sub>H<sub>16</sub>BrO<sub>3</sub>S<sub>2</sub> [M + H]<sup>+</sup>: m/z 470.9719, Found: 470.9705.

*2-(3-fluorophenyl)-3-tosyl-4H-thiochromen-4-one (3m)*

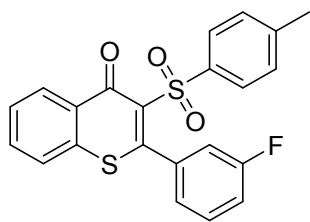

64.0 mg, 78%; White solid, m.p. 188-189°C;  $^1\text{H}$  NMR (600 MHz,  $\text{CDCl}_3$ )  $\delta$  8.39 (d,  $J = 7.8$  Hz, 1H), 7.93 (d,  $J = 8.4$  Hz, 2H), 7.66 (t,  $J = 8.4$  Hz, 1H), 7.56-7.47 (m, 3H), 7.34 (d,  $J = 7.8$  Hz, 1H), 7.29 (d,  $J = 7.8$  Hz, 2H), 7.23 (d,  $J = 11.4$  Hz, 2H), 2.40 (s, 3H).  $^{13}\text{C}$  NMR (150 MHz,  $\text{CDCl}_3$ )  $\delta$  176.1, 162.2 (d,  $J = 246.0$  Hz), 160.6, 160.5, 144.3, 138.7, 136.6 (d,  $J = 9.0$  Hz), 135.6, 133.6, 132.8, 131.9, 130.0 (d,  $J = 9.0$  Hz), 129.5, 129.3, 129.0, 125.4, 124.3 (d,  $J = 4.5$  Hz), 117.4 (d,  $J = 21.0$  Hz), 115.6 (d,  $J = 24.0$  Hz), 21.8.  $^{19}\text{F}$  NMR (564 MHz,  $\text{CDCl}_3$ )  $\delta$  -112.0. HRMS Calcd for  $\text{C}_{22}\text{H}_{16}\text{FO}_3\text{S}_2$   $[\text{M} + \text{H}]^+$ : m/z 411.0519, Found: 411.0505.

*2-phenyl-3-(phenylsulfonyl)-4H-thiochromen-4-one (3n)*

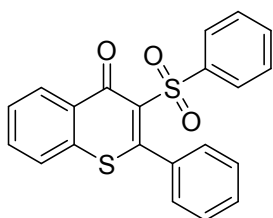

67.3 mg, 89%; White solid, m.p. 194-195°C;  $^1\text{H}$  NMR (400 MHz,  $\text{CDCl}_3$ )  $\delta$  8.38 (d,  $J = 8.4$  Hz, 1H), 8.04 (d,  $J = 7.6$  Hz, 2H), 7.65 (t,  $J = 7.6$  Hz, 1H), 7.57-7.52 (m, 8H), 7.48 (t,  $J = 7.6$  Hz, 2H).  $^{13}\text{C}$  NMR (150 MHz,  $\text{CDCl}_3$ )  $\delta$  176.3, 162.9, 142.0, 135.9, 134.8, 133.2, 133.1, 132.7, 131.9, 130.5, 129.4, 128.9, 128.8, 128.5, 128.3, 128.2, 125.4. HRMS Calcd for  $\text{C}_{21}\text{H}_{15}\text{O}_3\text{S}_2$   $[\text{M} + \text{H}]^+$ : m/z 379.0457, Found: 379.0443.

*3-(phenylsulfonyl)-2-(p-tolyl)-4H-thiochromen-4-one (3o)*

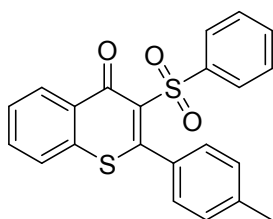

45.5 mg, 58%; White solid, m.p. 150-152 °C;  $^1\text{H}$  NMR (600 MHz,  $\text{CDCl}_3$ )  $\delta$  8.35 (d,  $J$

= 8.4 Hz, 1H), 8.03 (d,  $J = 7.8$  Hz, 2H), 7.64 (t,  $J = 8.4$  Hz, 1H), 7.56-7.51 (m, 3H), 7.49-7.46 (m, 4H), 7.32 (d,  $J = 8.4$  Hz, 2H), 2.46 (s, 3H).  $^{13}\text{C}$  NMR (150 MHz,  $\text{CDCl}_3$ )  $\delta$  176.3, 163.2, 142.1, 141.0, 136.0, 133.1, 132.9, 132.7, 131.9, 131.8, 129.3, 129.1, 128.8, 128.7, 128.5, 128.3, 125.4, 21.7. HRMS Calcd for  $\text{C}_{22}\text{H}_{17}\text{O}_3\text{S}_2$   $[\text{M} + \text{H}]^+$ :  $m/z$  393.0614, Found: 393.0621.

*3-((4-methoxyphenyl)sulfonyl)-2-phenyl-4H-thiochromen-4-one (3p)*

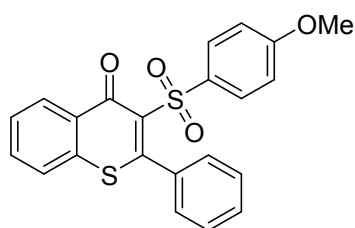

77.5 mg, 95%; White solid, m.p. 169-170°C;  $^1\text{H}$  NMR (600 MHz,  $\text{CDCl}_3$ )  $\delta$  8.40 (d,  $J = 8.4$  Hz, 1H), 7.99 (d,  $J = 9.0$  Hz, 2H), 7.64 (t,  $J = 7.2$  Hz, 1H), 7.55-7.51 (m, 7H), 6.95 (d,  $J = 8.4$  Hz, 2H), 3.85 (s, 3H).  $^{13}\text{C}$  NMR (150 MHz,  $\text{CDCl}_3$ )  $\delta$  176.4, 163.4, 162.1, 135.9, 135.1, 133.6, 133.4, 132.6, 132.0, 131.5, 130.4, 129.4, 128.8, 128.3, 128.2, 125.4, 113.7, 55.72. HRMS Calcd for  $\text{C}_{22}\text{H}_{17}\text{O}_4\text{S}_2$   $[\text{M} + \text{H}]^+$ :  $m/z$  409.0563, Found: 409.0557.

*3-((4-(tert-butyl)phenyl)sulfonyl)-2-phenyl-4H-thiochromen-4-one (3q)*

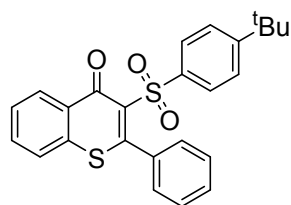

54.7 mg, 63%; White solid, m.p. 167-168 °C;  $^1\text{H}$  NMR (600 MHz,  $\text{CDCl}_3$ )  $\delta$  8.41 (d,  $J = 7.8$  Hz, 1H), 7.97 (d,  $J = 8.4$  Hz, 2H), 7.65 (t,  $J = 8.4$  Hz, 1H), 7.56-7.48 (m, 9H), 1.32 (s, 9H).  $^{13}\text{C}$  NMR (150 MHz,  $\text{CDCl}_3$ )  $\delta$  176.4, 162.5, 157.0, 138.8, 135.9, 134.9, 133.3, 132.7, 132.0, 130.4, 129.4, 128.9, 128.8, 128.2, 128.1, 125.7, 125.4, 35.3, 31.2. HRMS Calcd for  $\text{C}_{22}\text{H}_{23}\text{O}_3\text{S}_2$   $[\text{M} + \text{H}]^+$ :  $m/z$  435.1083, Found: 435.1062.

*2-phenyl-3-(o-tolylsulfonyl)-4H-thiochromen-4-one (3r)*

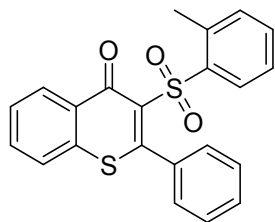

40.2 mg, 51%; White solid, m.p. 190-191°C; <sup>1</sup>H NMR (600 MHz, CDCl<sub>3</sub>) δ 8.31 (d, *J* = 7.8 Hz, 1H), 8.19 (d, *J* = 7.8 Hz, 1H), 7.66 (t, *J* = 7.2 Hz, 1H), 7.62 (d, *J* = 7.2 Hz, 2H), 7.57-7.49 (m, 5H), 7.41-7.34 (m, 2H), 7.12 (d, *J* = 7.2 Hz, 1H), 2.38 (s, 3H). <sup>13</sup>C NMR (150 MHz, CDCl<sub>3</sub>) δ 175.9, 162.5, 140.5, 136.6, 136.0, 134.5, 133.0, 132.9, 132.7, 132.0, 131.6, 130.9, 130.4, 129.4, 128.9, 128.6, 128.4, 126.1, 125.6, 19.9. HRMS Calcd for C<sub>22</sub>H<sub>17</sub>O<sub>3</sub>S<sub>2</sub> [M + H]<sup>+</sup>: m/z 393.0614, Found: 393.0604.

*2-phenyl-3-(m-tolylsulfonyl)-4H-thiochromen-4-one (3s)*

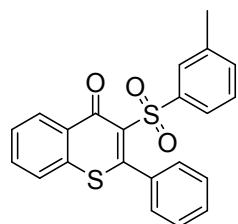

46.3 mg, 59%; White solid, m.p. 167-168 °C; <sup>1</sup>H NMR (600 MHz, CDCl<sub>3</sub>) δ 8.39 (d, *J* = 7.8 Hz, 1H), 7.82 (d, *J* = 5.4 Hz, 2H), 7.65 (t, *J* = 7.8 Hz, 1H), 7.57-7.49 (m, 7H), 7.38-7.33 (m, 2H), 2.41 (s, 3H). <sup>13</sup>C NMR (150 MHz, CDCl<sub>3</sub>) δ 176.3, 162.7, 141.9, 138.6, 135.9, 134.8, 134.0, 133.1, 132.7, 132.0, 130.5, 129.5, 129.0, 128.9, 128.4, 128.3, 125.9, 125.4, 21.5. HRMS Calcd for C<sub>22</sub>H<sub>17</sub>O<sub>3</sub>S<sub>2</sub> [M + H]<sup>+</sup>: m/z 393.0614, Found: 393.0604.

*3-((4-fluorophenyl)sulfonyl)-2-phenyl-4H-thiochromen-4-one (3t)*

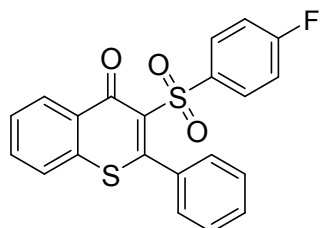

62.6 mg, 79%; White solid, m.p. 184-185 °C; <sup>1</sup>H NMR (600 MHz, CDCl<sub>3</sub>) δ 8.37 (d, *J* = 7.8 Hz, 1H), 8.06 (q, *J* = 9.0, 4.8 Hz, 2H), 7.66 (t, *J* = 7.2 Hz, 1H), 7.57-7.50 (m, 7H),

7.14 (t,  $J = 9.0$  Hz, 2H).  $^{13}\text{C}$  NMR (150 MHz,  $\text{CDCl}_3$ )  $\delta$  176.2, 165.5 (d,  $J = 253.5$  Hz), 163.1, 137.8 (d,  $J = 3.0$  Hz), 135.8, 134.7, 132.9, 132.8, 131.9 (d,  $J = 10.5$  Hz), 131.9, 130.6, 129.3, 129.0, 128.3, 128.2, 125.5, 115.7 (d,  $J = 22.5$  Hz).  $^{19}\text{F}$  NMR (564 MHz,  $\text{CDCl}_3$ )  $\delta$  -104.5. HRMS Calcd for  $\text{C}_{21}\text{H}_{14}\text{FO}_3\text{S}_2$   $[\text{M} + \text{H}]^+$ :  $m/z$  397.0363, Found: 397.0327.

*3-((4-chlorophenyl)sulfonyl)-2-phenyl-4H-thiochromen-4-one (3u)*

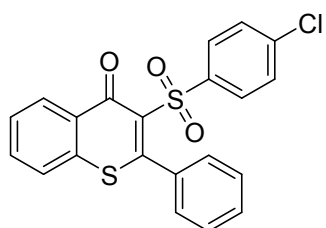

38.0 mg, 46%; White solid, m.p. 172-173 °C;  $^1\text{H}$  NMR (400 MHz,  $\text{CDCl}_3$ )  $\delta$  8.38 (d,  $J = 8.0$  Hz, 1H), 7.97 (d,  $J = 8.4$  Hz, 2H), 7.67 (t,  $J = 7.2$  Hz, 1H), 7.58-7.54 (m, 7H), 7.45 (d,  $J = 8.0$  Hz, 2H).  $^{13}\text{C}$  NMR (150 MHz,  $\text{CDCl}_3$ )  $\delta$  176.2, 163.3, 140.5, 139.8, 135.9, 134.7, 132.9, 132.8, 131.9, 130.7, 130.5, 129.4, 129.1, 128.8, 128.4, 128.2, 125.5. HRMS Calcd for  $\text{C}_{21}\text{H}_{14}\text{ClO}_3\text{S}_2$   $[\text{M} + \text{H}]^+$ :  $m/z$  413.0067, Found: 413.0050.

*3-((4-bromophenyl)sulfonyl)-2-phenyl-4H-thiochromen-4-one (3v)*

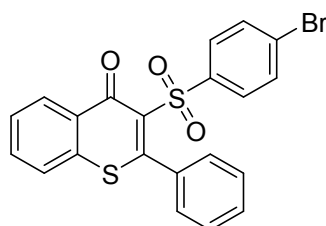

57.5 mg, 63%; White solid, m.p. 173-174 °C;  $^1\text{H}$  NMR (600 MHz,  $\text{CDCl}_3$ )  $\delta$  8.38 (d,  $J = 8.4$  Hz, 1H), 7.90 (d,  $J = 9.0$  Hz, 2H), 7.67 (t,  $J = 6.6$  Hz, 1H), 7.61 (d,  $J = 8.4$  Hz, 2H), 7.58-7.51 (m, 7H).  $^{13}\text{C}$  NMR (150 MHz,  $\text{CDCl}_3$ )  $\delta$  176.2, 163.3, 141.0, 135.8, 134.6, 132.9, 132.7, 131.9, 131.8, 130.7, 130.5, 129.4, 129.1, 128.4, 128.3, 128.2, 125.5. HRMS Calcd for  $\text{C}_{21}\text{H}_{14}\text{BrO}_3\text{S}_2$   $[\text{M} + \text{H}]^+$ :  $m/z$  456.9562, Found: 456.9552.

*3-((4-iodophenyl)sulfonyl)-2-phenyl-4H-thiochromen-4-one (3w)*

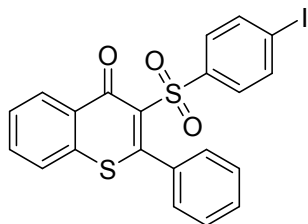

60.4 mg, 60%; White solid, m.p. 176-177 °C; <sup>1</sup>H NMR (400 MHz, CDCl<sub>3</sub>) δ 8.37 (d, *J* = 8.4 Hz, 1H), 7.83 (d, *J* = 8.0 Hz, 2H), 7.74 (d, *J* = 8.0 Hz, 2H), 7.67 (t, *J* = 7.6 Hz, 1H), 7.58-7.53 (m, 7H). <sup>13</sup>C NMR (150 MHz, CDCl<sub>3</sub>) δ 176.2, 163.3, 141.7, 137.8, 135.8, 134.6, 132.9, 132.7, 131.8, 130.7, 130.4, 129.4, 129.1, 128.4, 128.2, 125.5, 101.2. HRMS Calcd for C<sub>21</sub>H<sub>14</sub>IO<sub>3</sub>S<sub>2</sub> [M + H]<sup>+</sup>: *m/z* 504.9424, Found: 504.9443.

*3-(naphthalen-1-ylsulfonyl)-2-phenyl-4H-thiochromen-4-one (3x)*

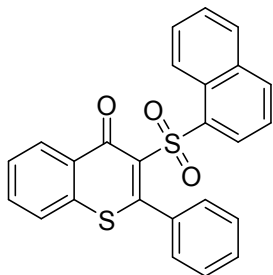

42.8 mg, 50%; White solid, m.p. 196-197 °C; <sup>1</sup>H NMR (600 MHz, CDCl<sub>3</sub>) δ 8.52 (d, *J* = 7.2 Hz, 1H), 8.28 (d, *J* = 8.4 Hz, 1H), 8.18 (d, *J* = 8.4 Hz, 1H), 8.00 (d, *J* = 8.4 Hz, 1H), 7.84 (d, *J* = 7.8 Hz, 1H), 7.70-7.67 (m, 2H), 7.61-7.52 (m, 5H), 7.50-7.40 (m, 4H). <sup>13</sup>C NMR (150 MHz, CDCl<sub>3</sub>) δ 175.8, 162.2, 136.7, 135.8, 134.5, 134.4, 133.9, 133.6, 132.6, 131.6, 131.3, 131.0, 129.4, 129.1, 128.8, 128.7, 128.5, 127.9, 126.3, 125.4, 124.5, 123.8. HRMS Calcd for C<sub>25</sub>H<sub>17</sub>O<sub>3</sub>S<sub>2</sub> [M + H]<sup>+</sup>: *m/z* 429.0614, Found: 429.0594.

*2-phenyl-3-(thiophen-2-ylsulfonyl)-4H-thiochromen-4-one (3y)*

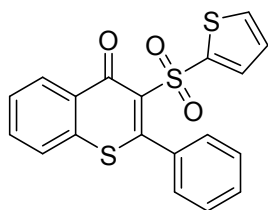

33.1 mg, 43%; White solid, m.p. 150-151 °C; <sup>1</sup>H NMR (600 MHz, CDCl<sub>3</sub>) δ 8.50 (d, *J* = 7.8 Hz, 1H), 7.93 (d, *J* = 3.6 Hz, 1H), 7.69-7.65 (m, 2H), 7.60 (t, *J* = 7.8 Hz, 1H),

7.55-7.50 (m, 6H), 7.08 (t,  $J = 4.8$  Hz, 1H).  $^{13}\text{C}$  NMR (150 MHz,  $\text{CDCl}_3$ )  $\delta$  176.6, 162.7, 143.0, 135.8, 135.7, 134.9, 134.3, 133.1, 132.8, 132.0, 130.5, 129.5, 129.0, 128.3, 128.1, 127.1, 125.4. HRMS Calcd for  $\text{C}_{19}\text{H}_{13}\text{O}_3\text{S}_3$   $[\text{M} + \text{H}]^+$ :  $m/z$  385.0021, Found: 384.9998.

*2,6-di-tert-butyl-4-(tosylmethyl)phenol (4)*

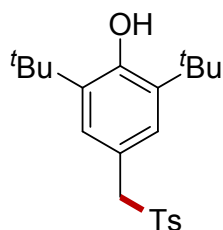

13.5 mg, 18%; White solid;  $^1\text{H}$  NMR (600 MHz,  $\text{CDCl}_3$ )  $\delta$  7.44 (d,  $J = 8.4$  Hz, 2H), 7.21 (d,  $J = 7.8$  Hz, 2H), 6.73 (s, 2H), 5.23 (s, 1H), 4.19 (s, 2H), 2.40 (s, 3H), 1.32 (s, 18H).  $^{13}\text{C}$  NMR (150 MHz,  $\text{CDCl}_3$ )  $\delta$  154.3, 144.4, 136.1, 135.1, 129.4, 129.0, 127.8, 119.1, 63.4, 34.3, 30.2, 21.7. HRMS Calcd for  $\text{C}_{22}\text{H}_{30}\text{NaO}_3\text{S}$   $[\text{M} + \text{Na}]^+$ :  $m/z$  397.1808, Found: 397.1784.

*1-phenyl-2-tosylethan-1-one (5)<sup>1</sup>*

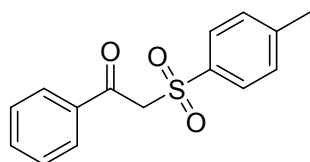

23.7 mg, 43%; White solid;  $^1\text{H}$  NMR (600 MHz,  $\text{CDCl}_3$ )  $\delta$  7.95 (d,  $J = 7.2$  Hz, 2H), 7.76 (d,  $J = 8.4$  Hz, 2H), 7.62 (t,  $J = 7.2$  Hz, 1H), 7.48 (t,  $J = 7.8$  Hz, 2H), 7.34 (d,  $J = 7.8$  Hz, 2H), 4.71 (s, 2H), 2.44 (s, 3H).  $^{13}\text{C}$  NMR (150 MHz,  $\text{CDCl}_3$ )  $\delta$  188.3, 145.5, 136.0, 135.9, 134.5, 130.0, 129.5, 129.0, 128.8, 63.8, 21.9. HRMS Calcd for  $\text{C}_{15}\text{H}_{15}\text{O}_3\text{S}$   $[\text{M} + \text{H}]^+$ :  $m/z$  275.0736, Found: 275.0737.

## Reference

- (1) Xie, L.; Zhen, X.; Huang, S.; Su, X.; Lin, M.; Li, Y. Photoinduced rearrangement of vinyl tosylates to  $\beta$ -ketosulfones. *Green Chemistry* **2017**, *19*, 3530-3534.

## 4. NMR copies of products

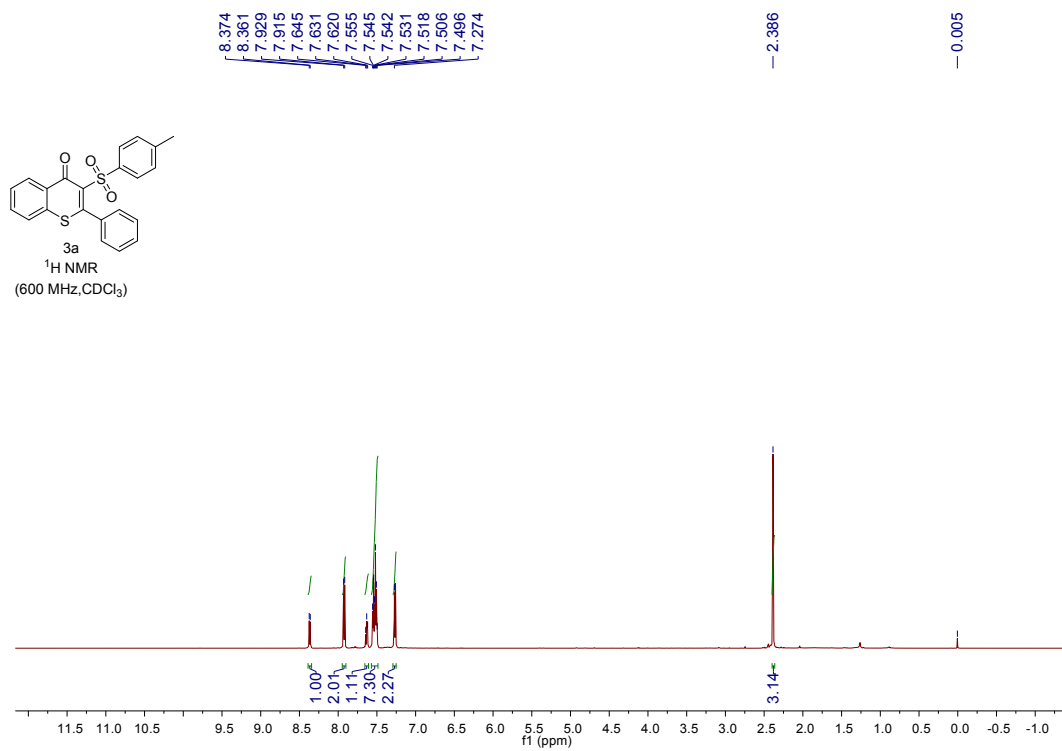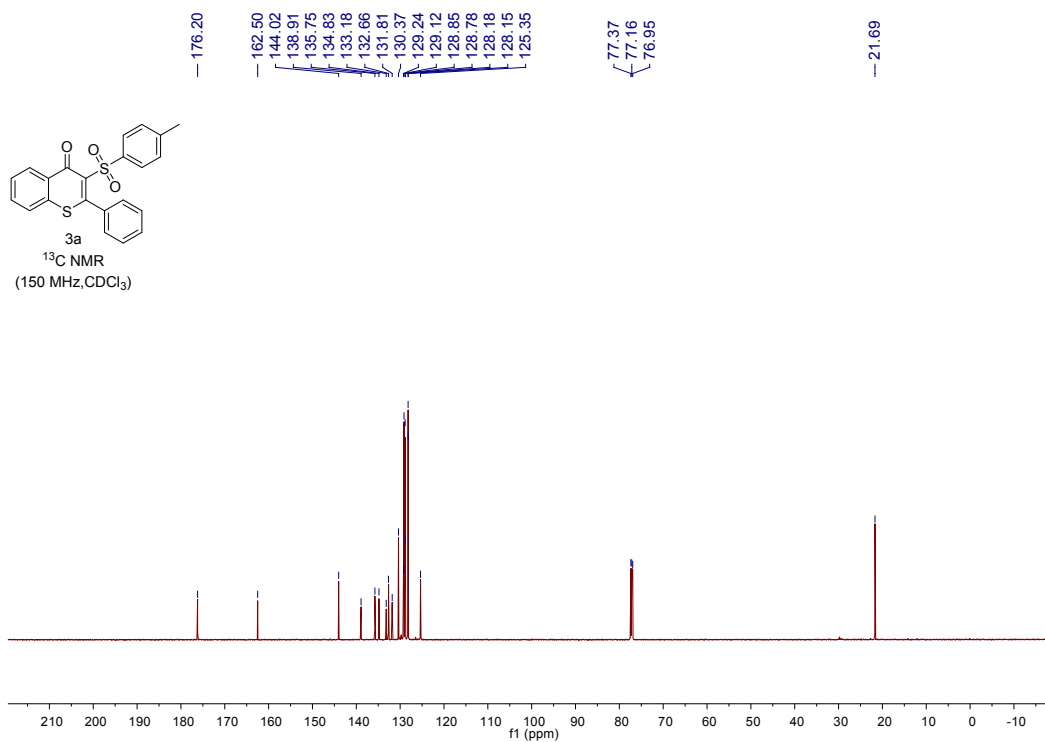



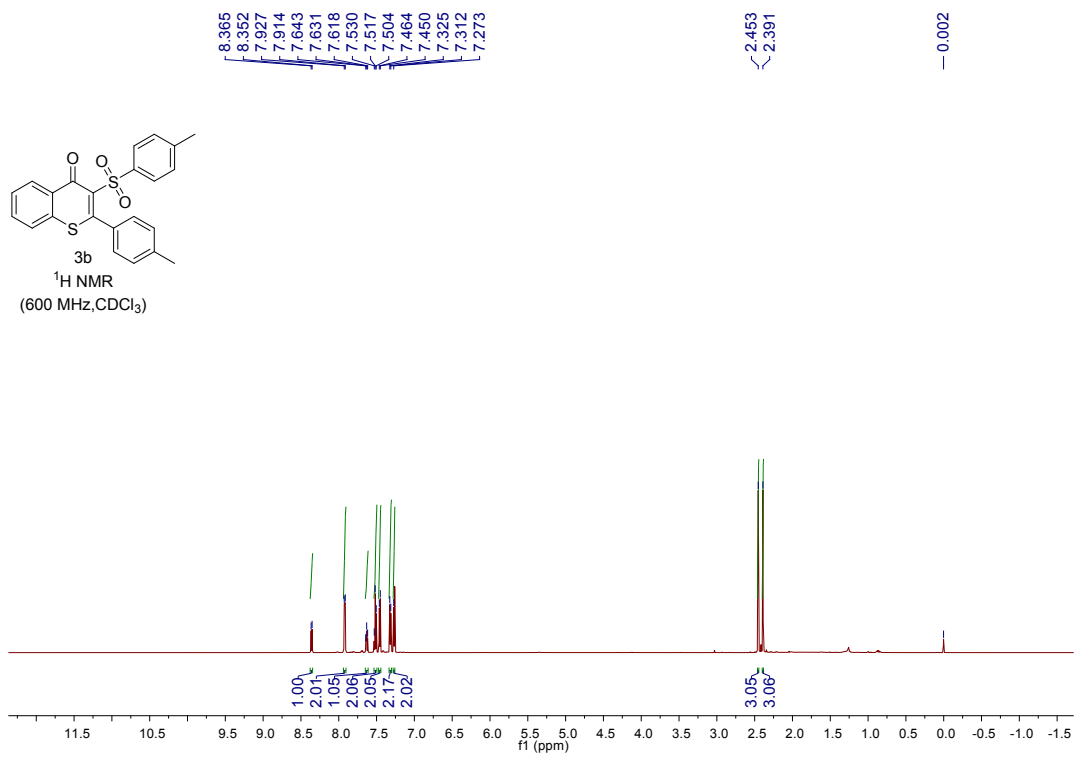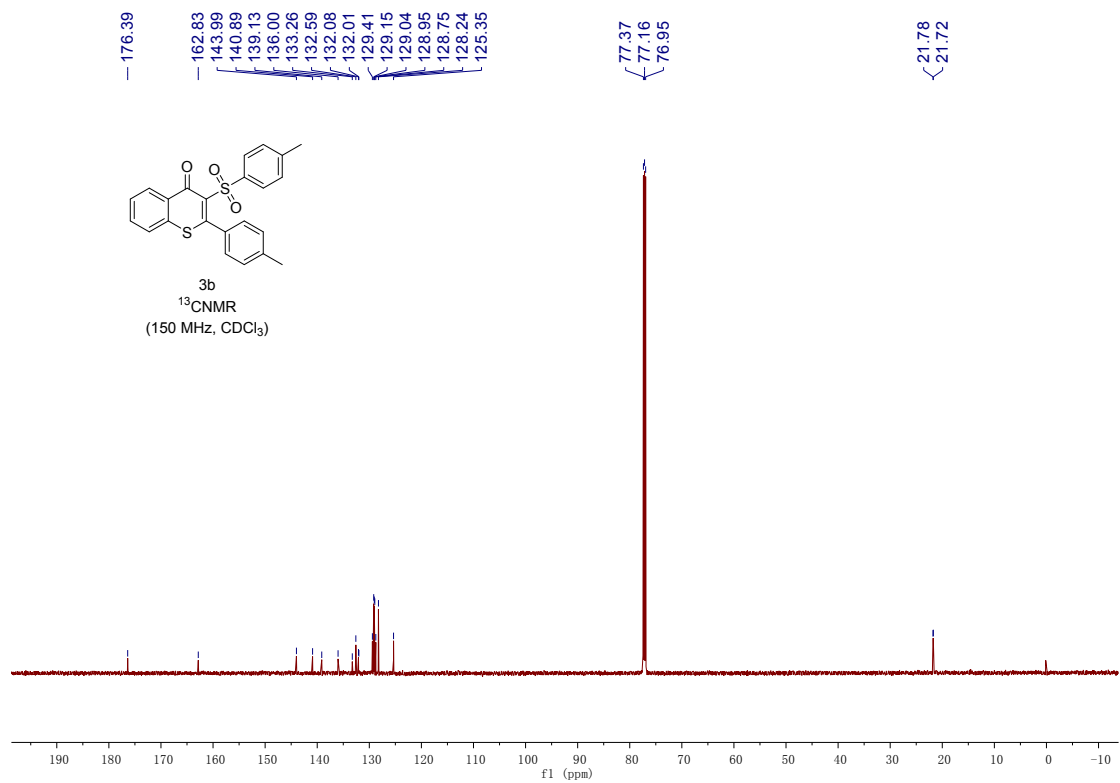



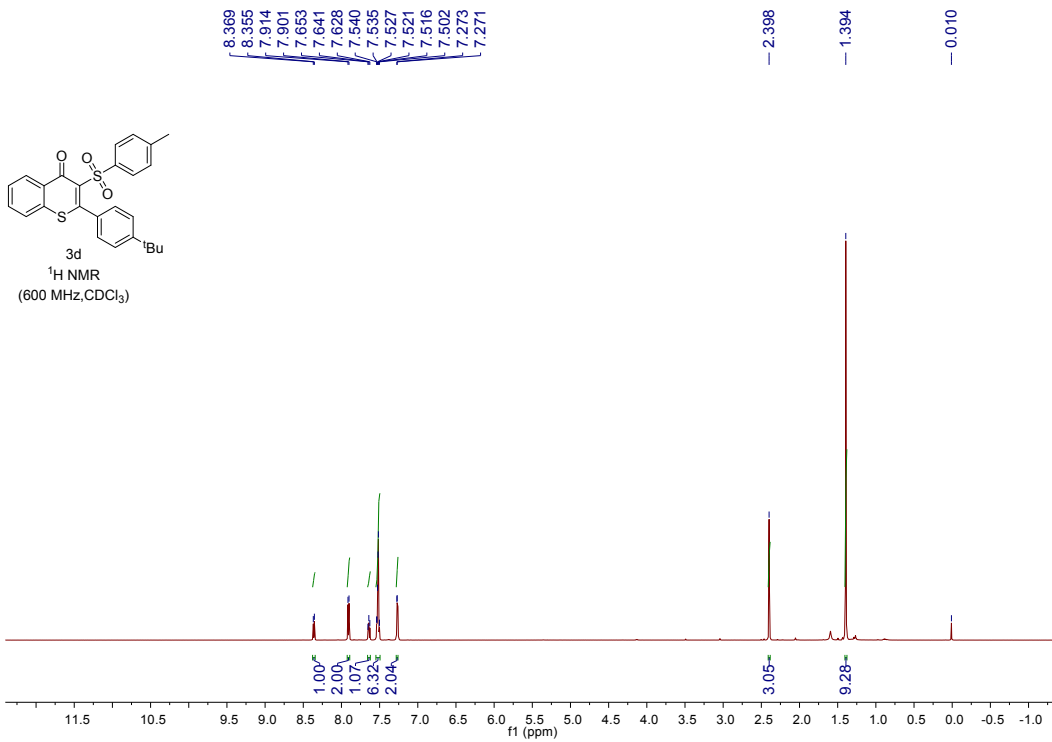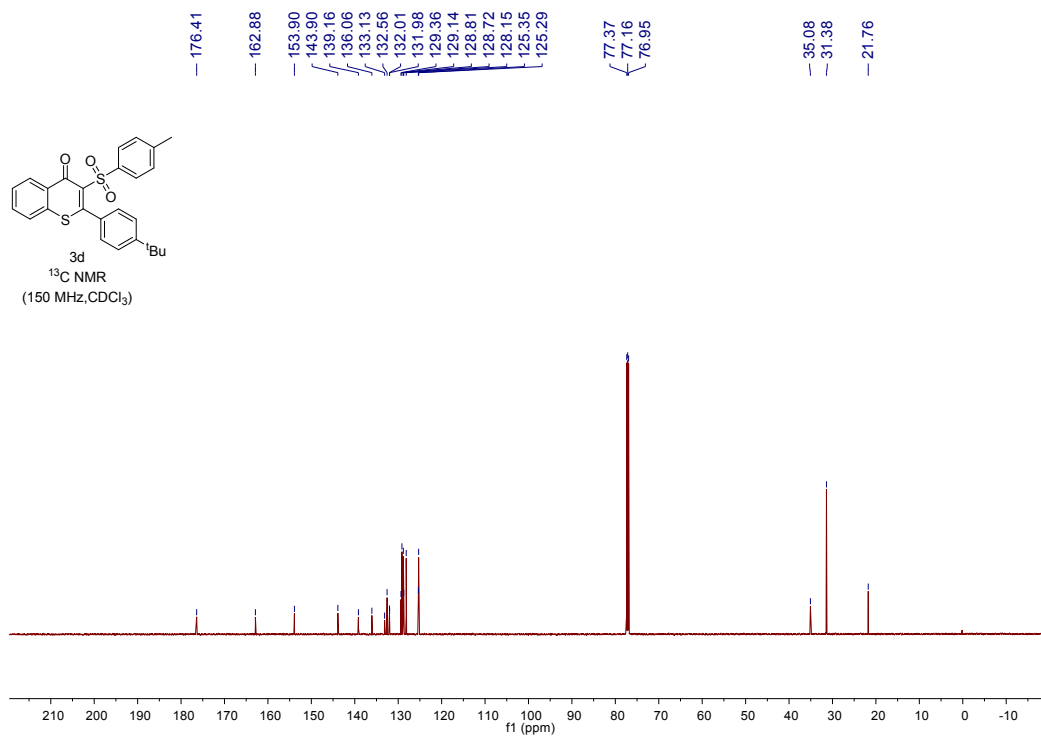

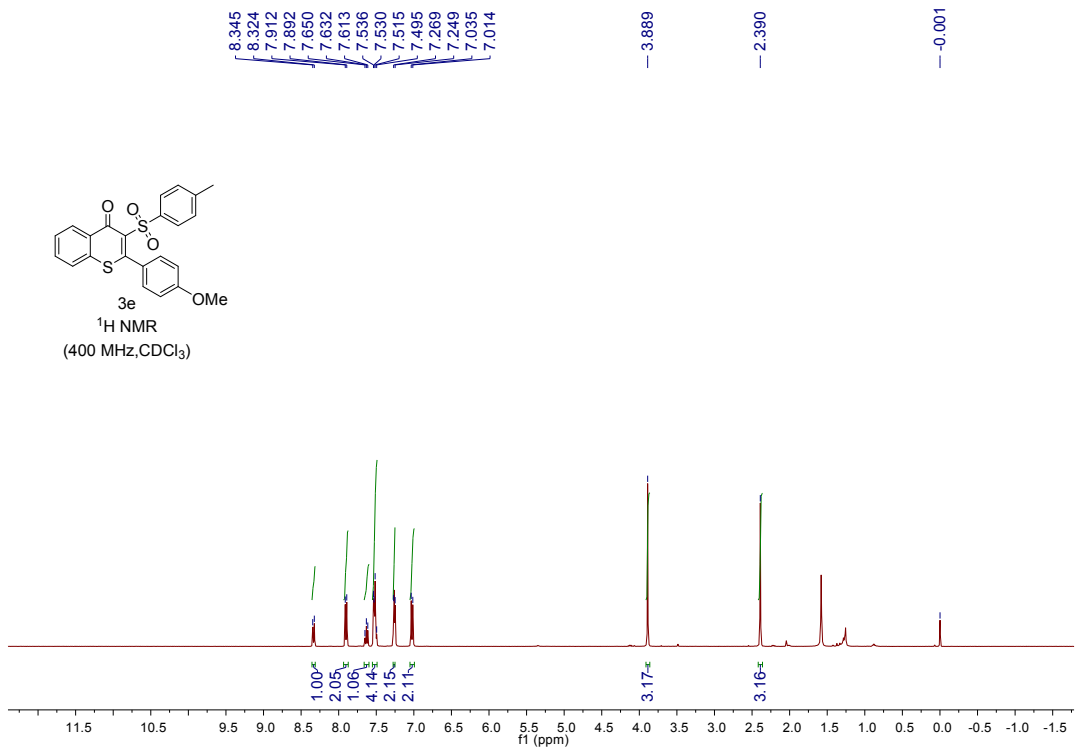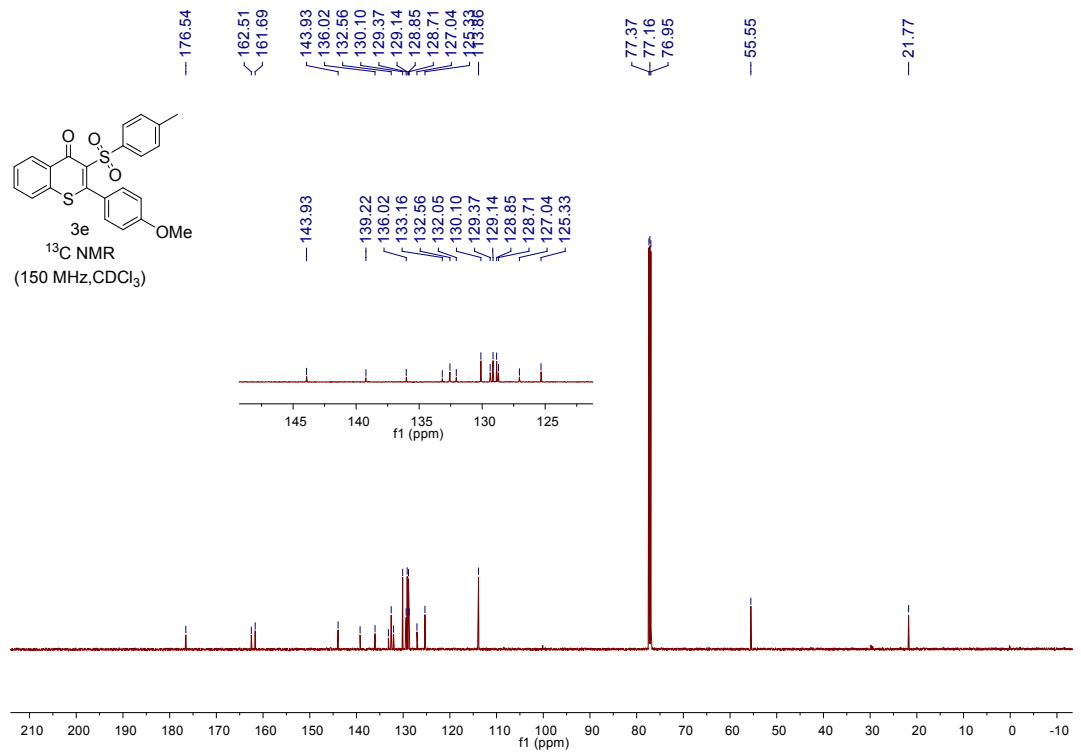

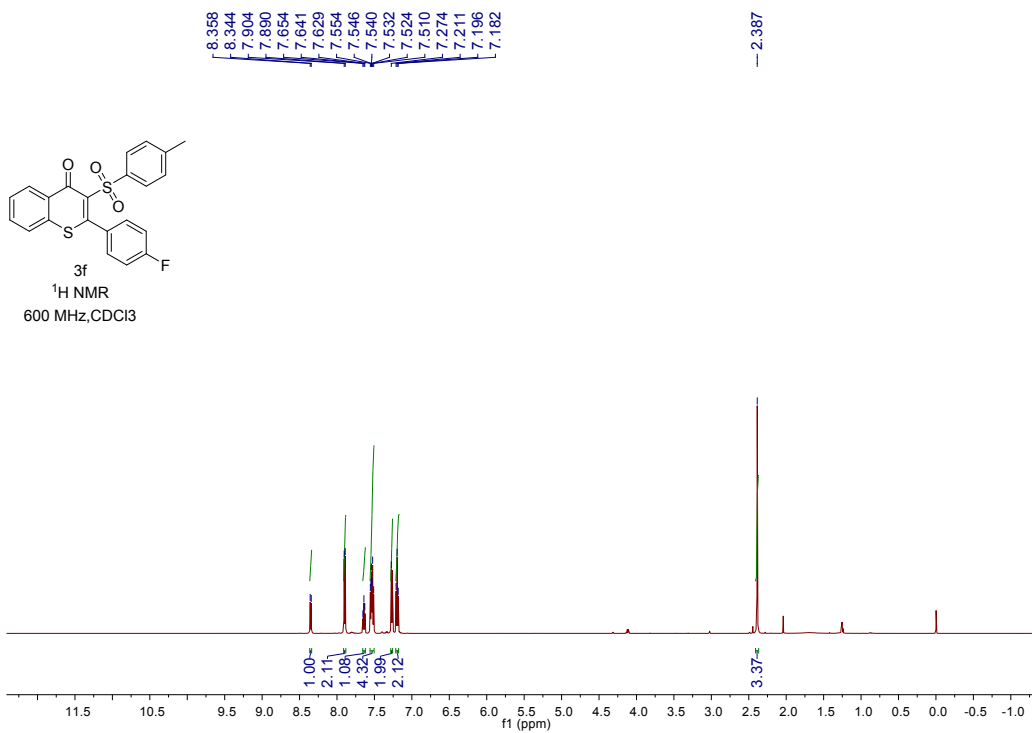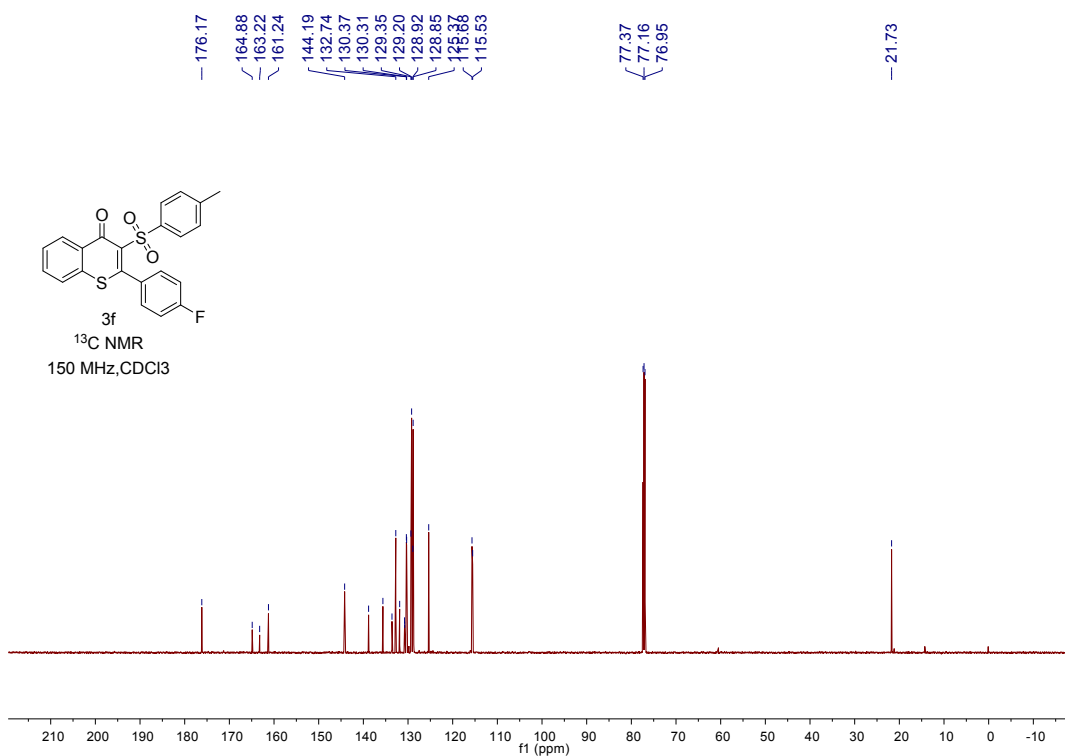

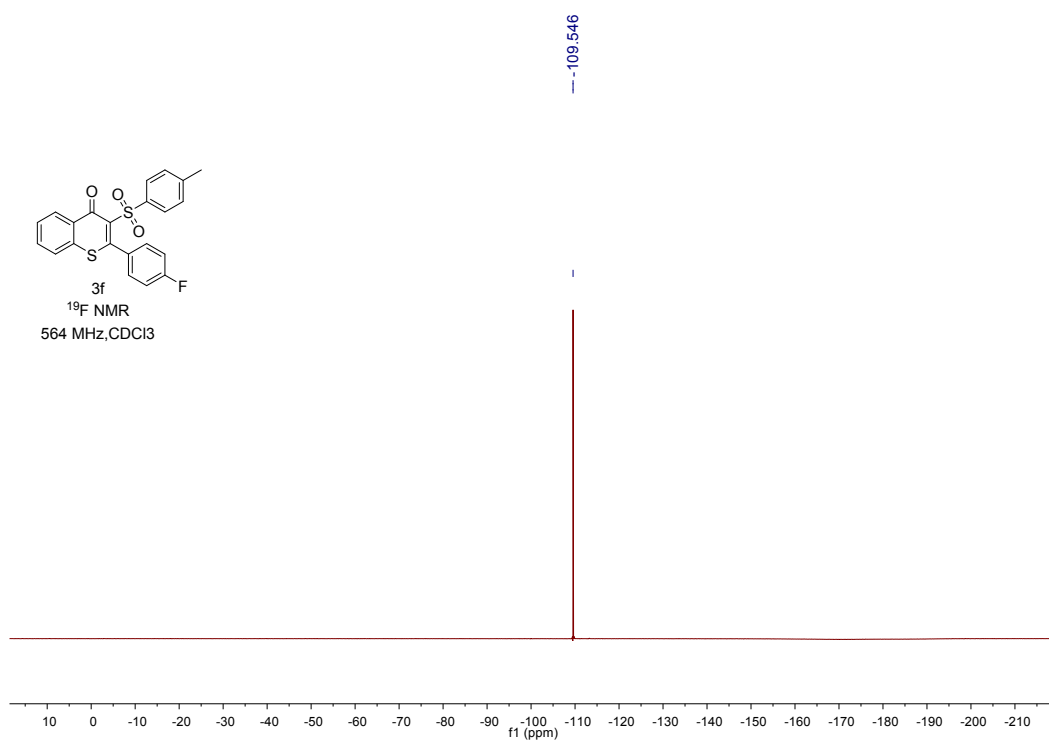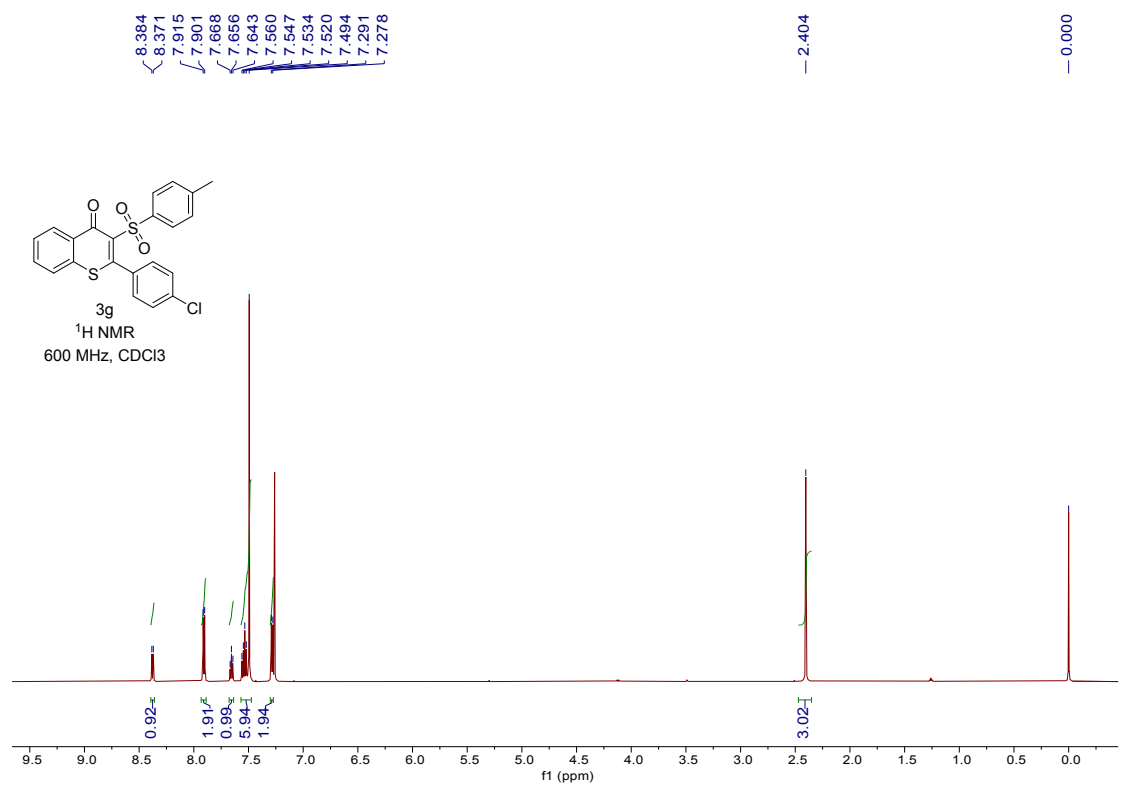

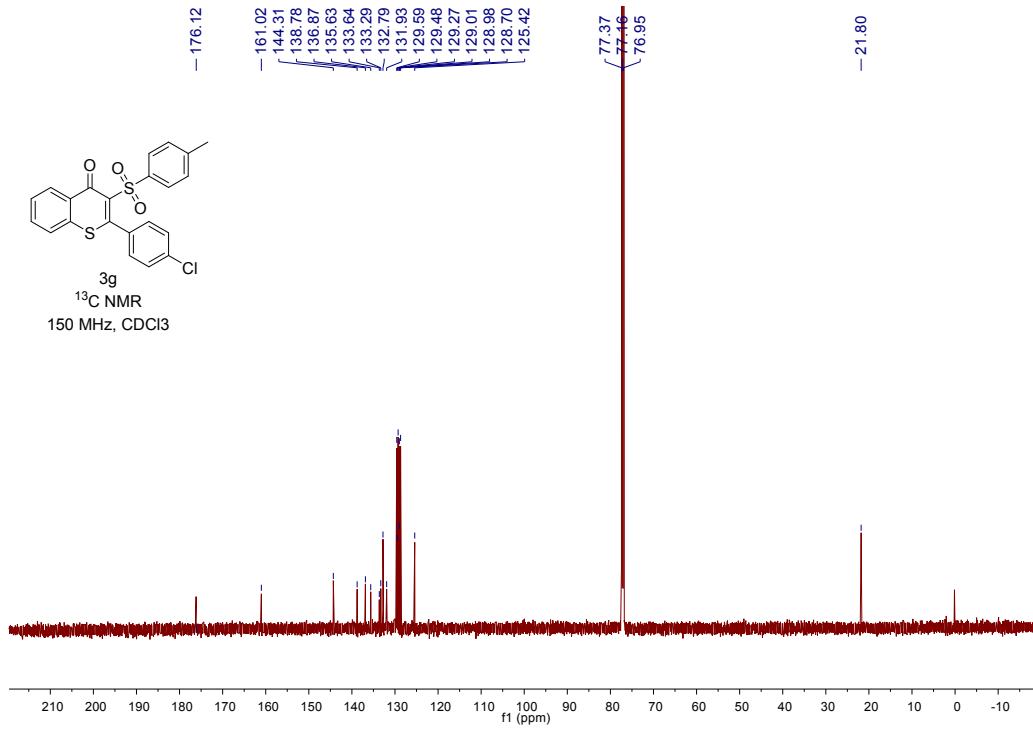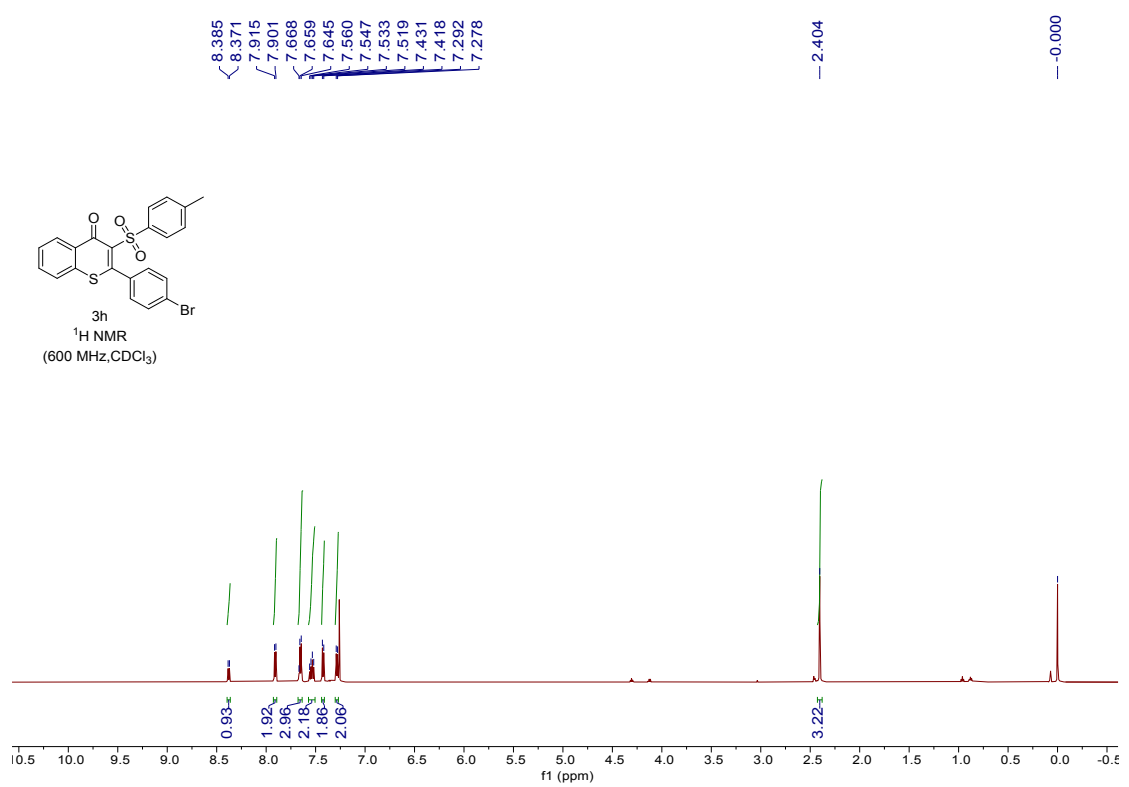

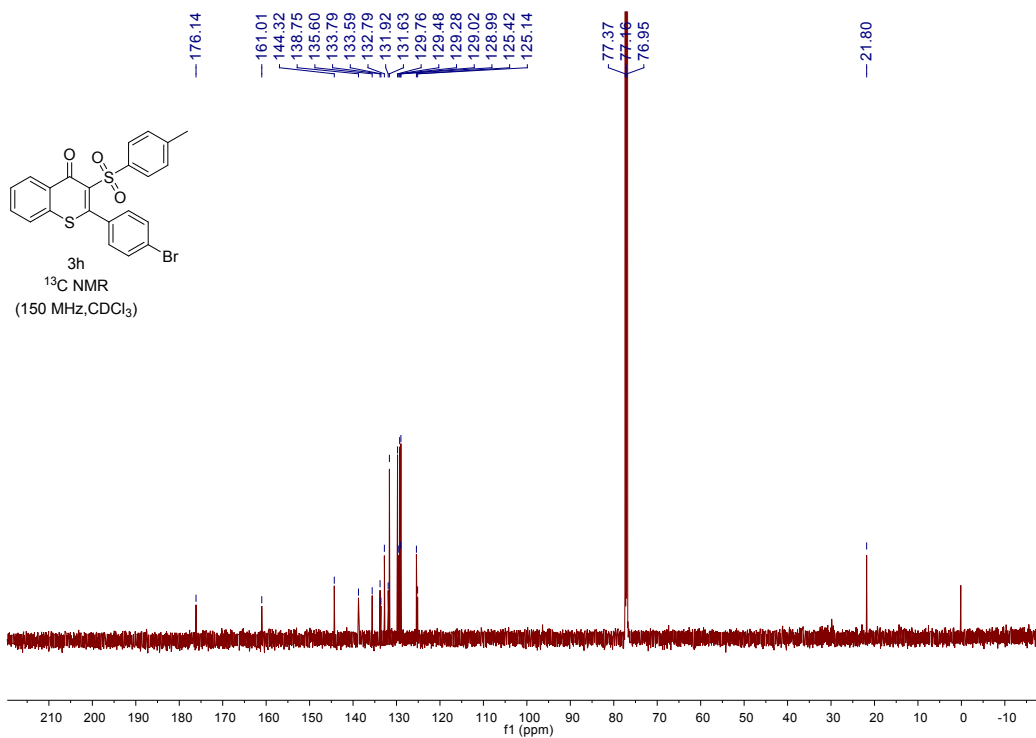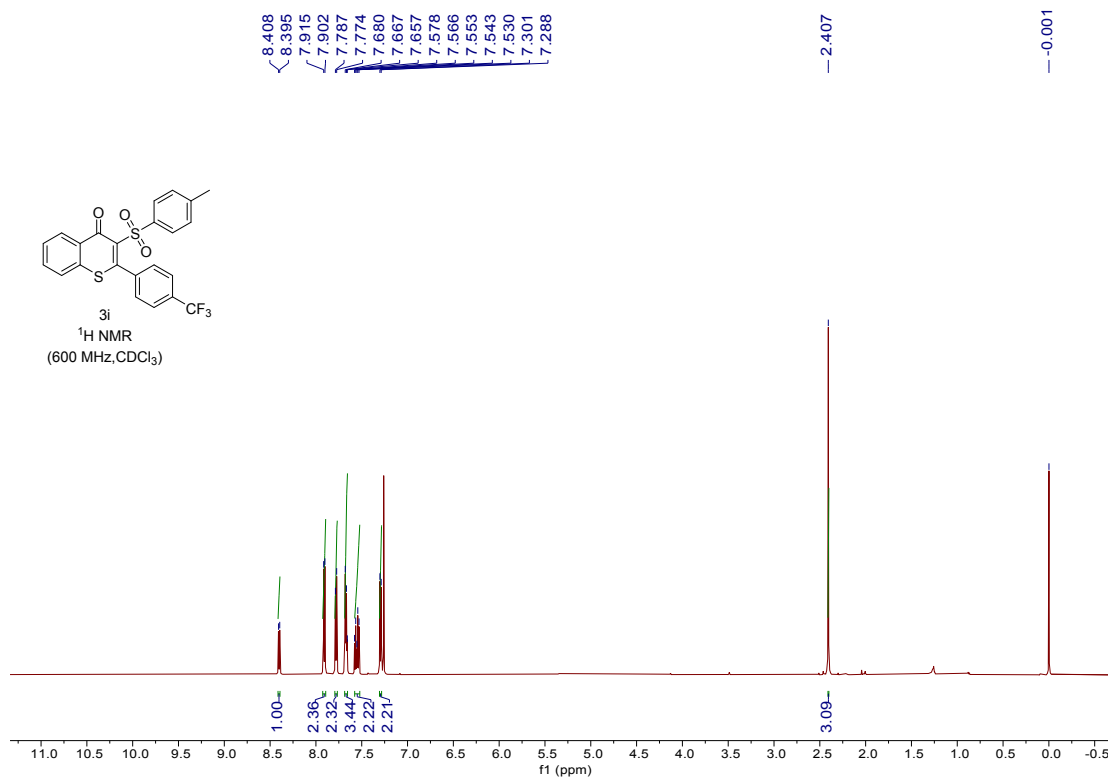



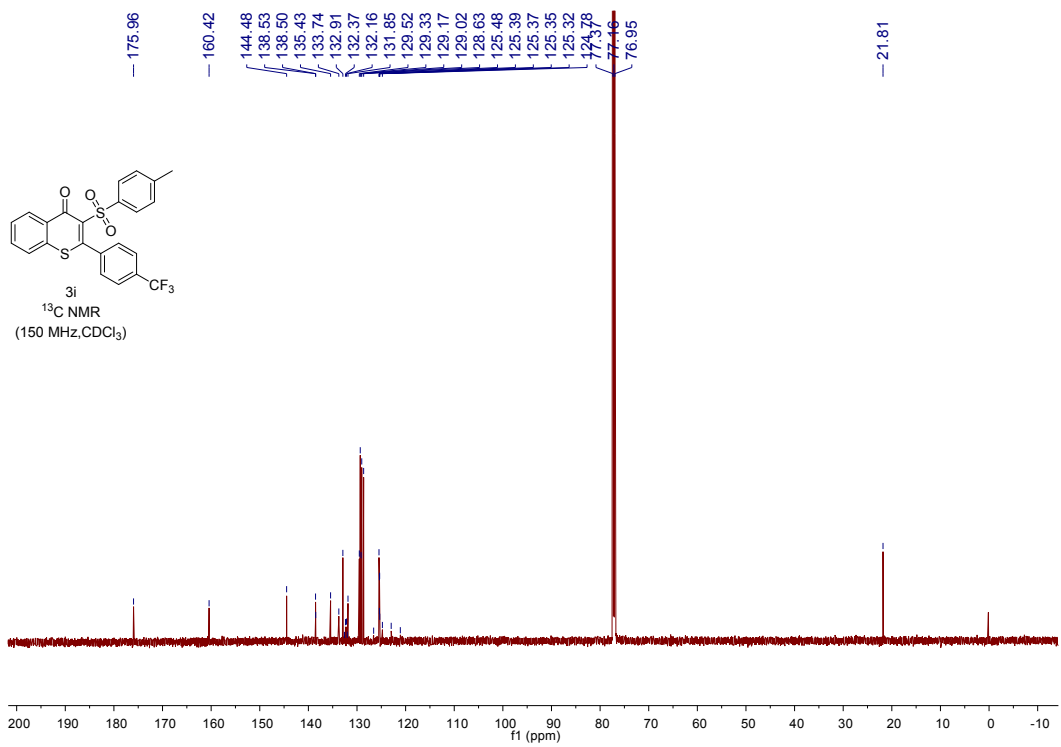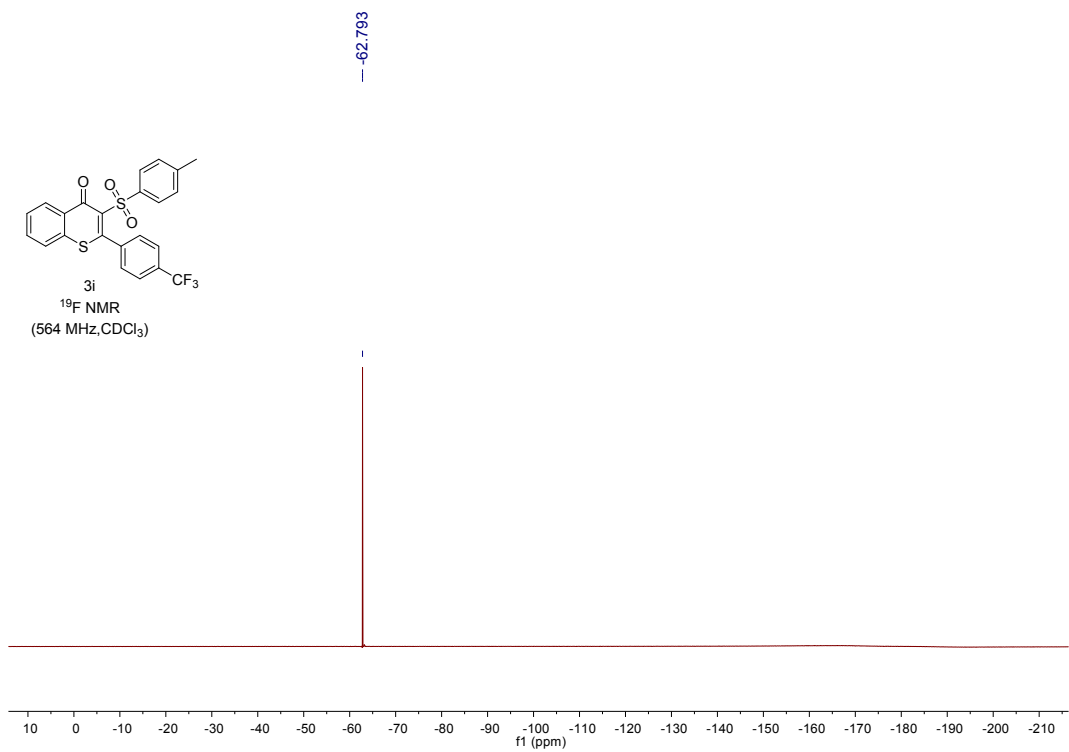

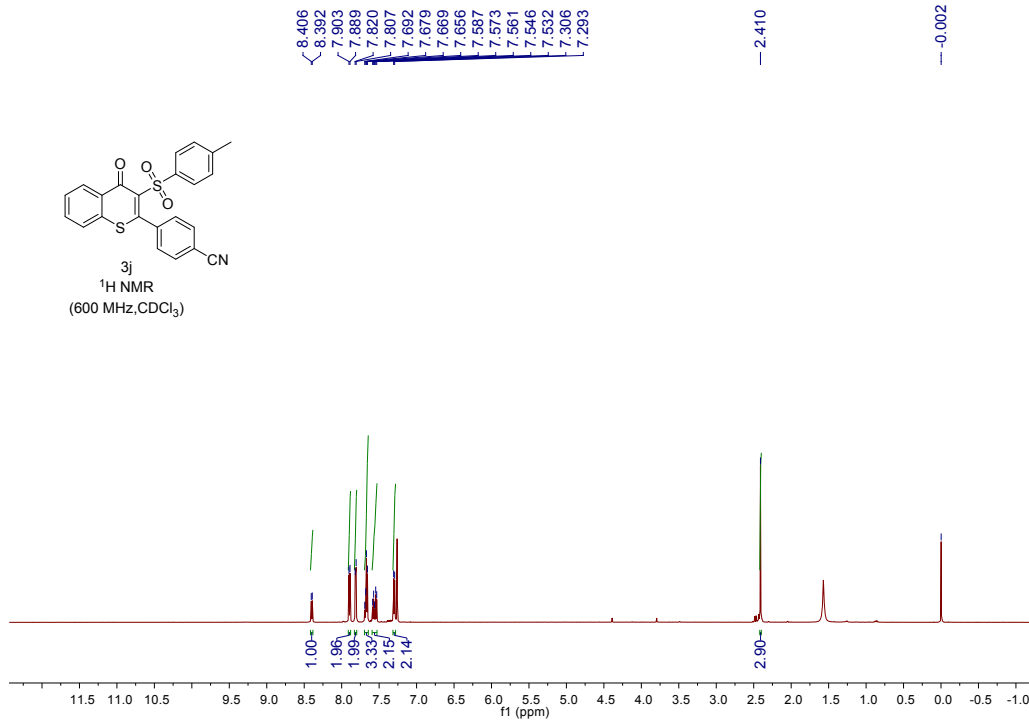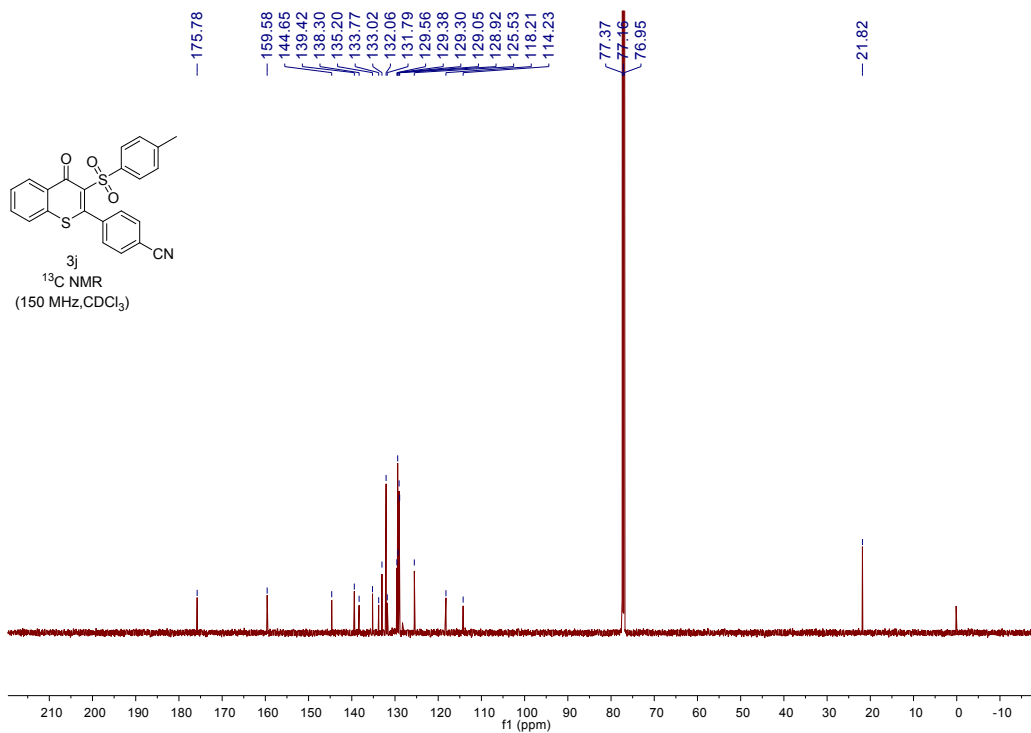

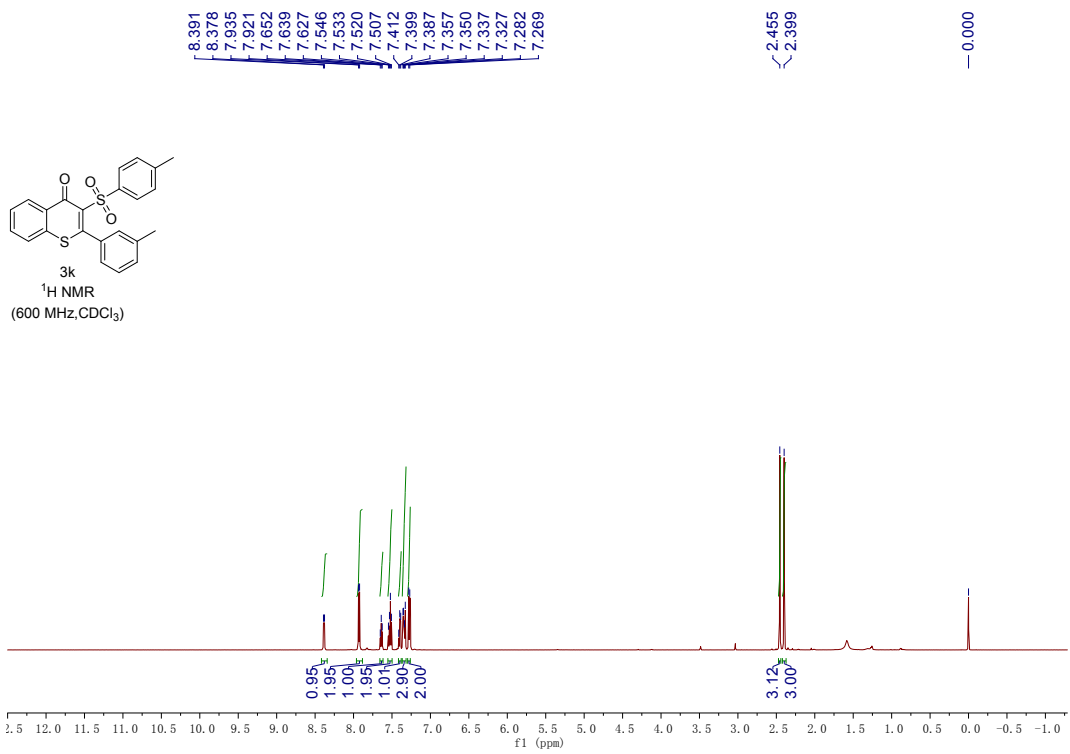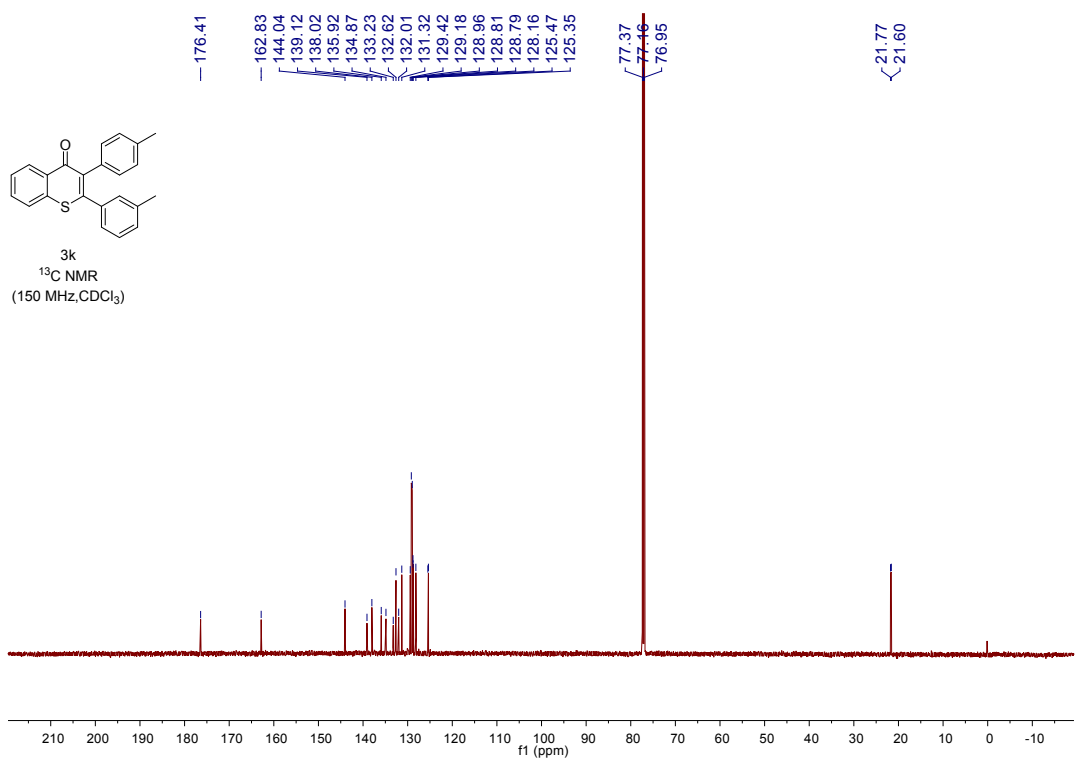

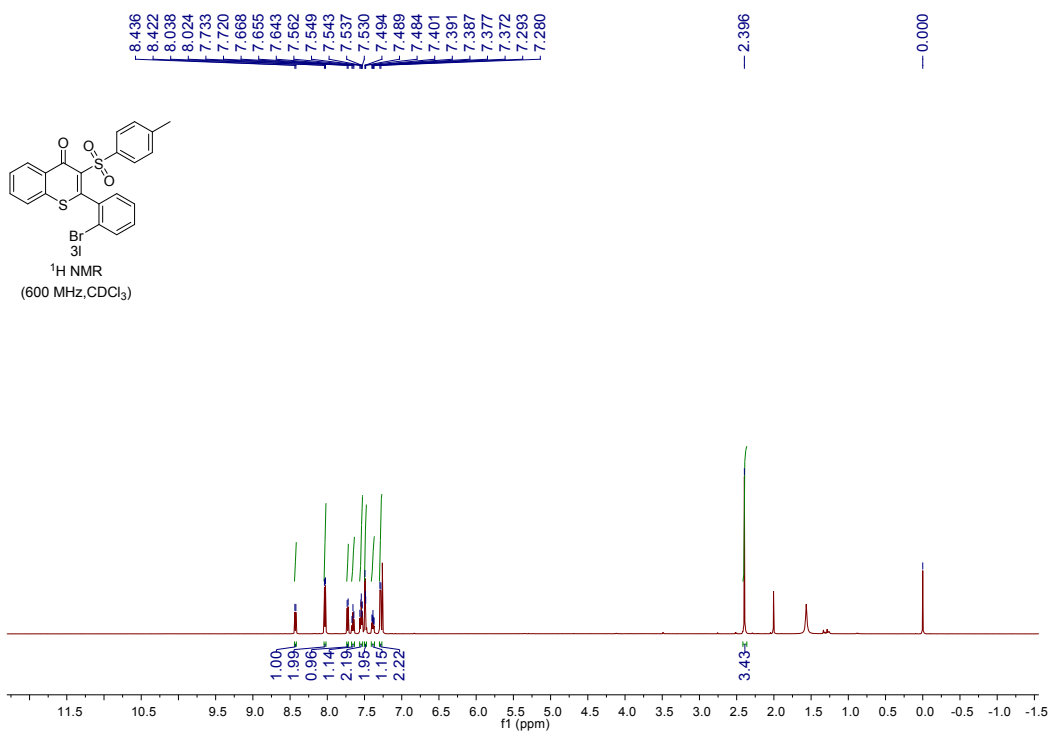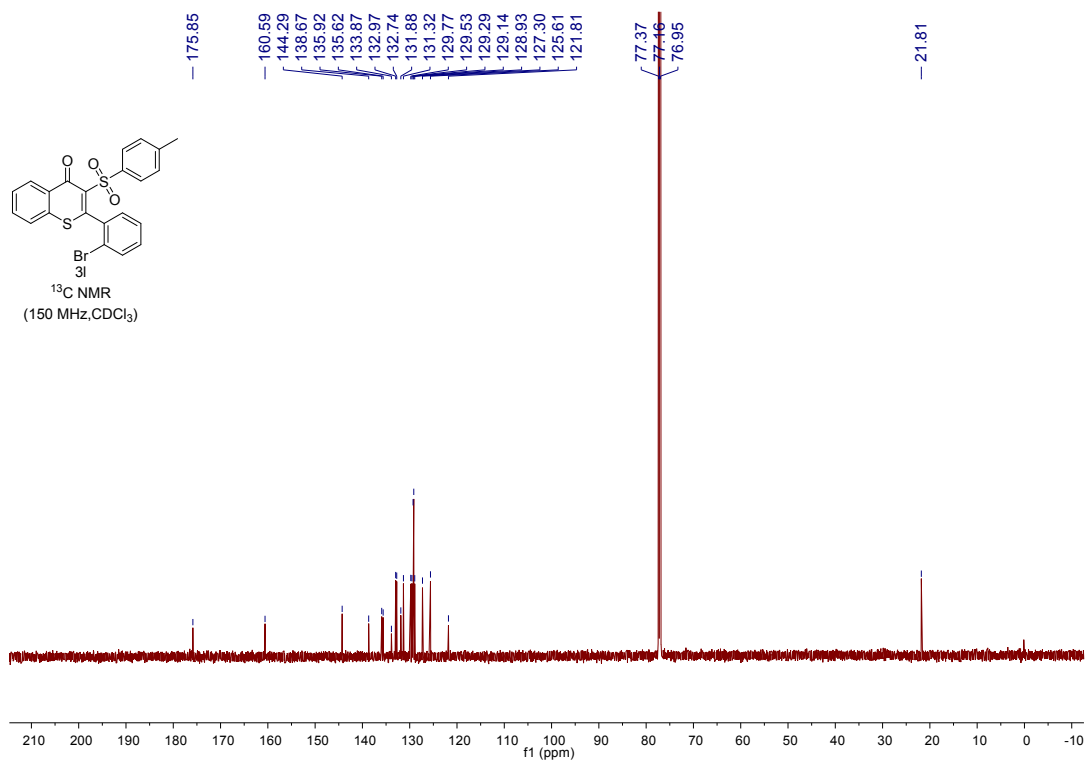

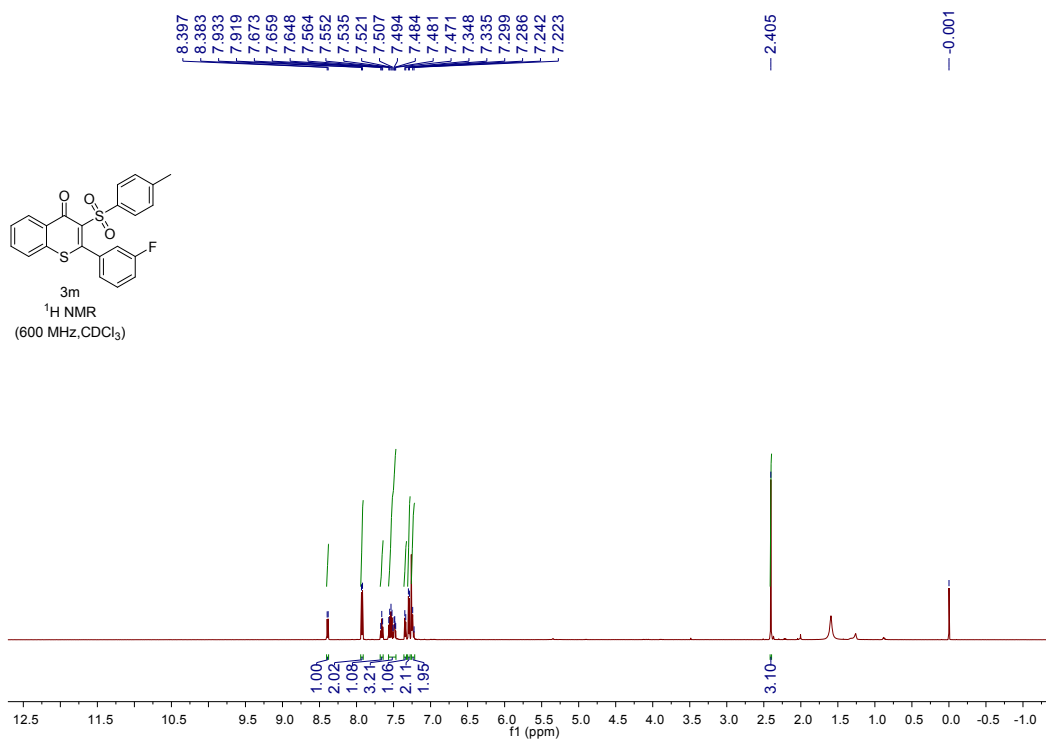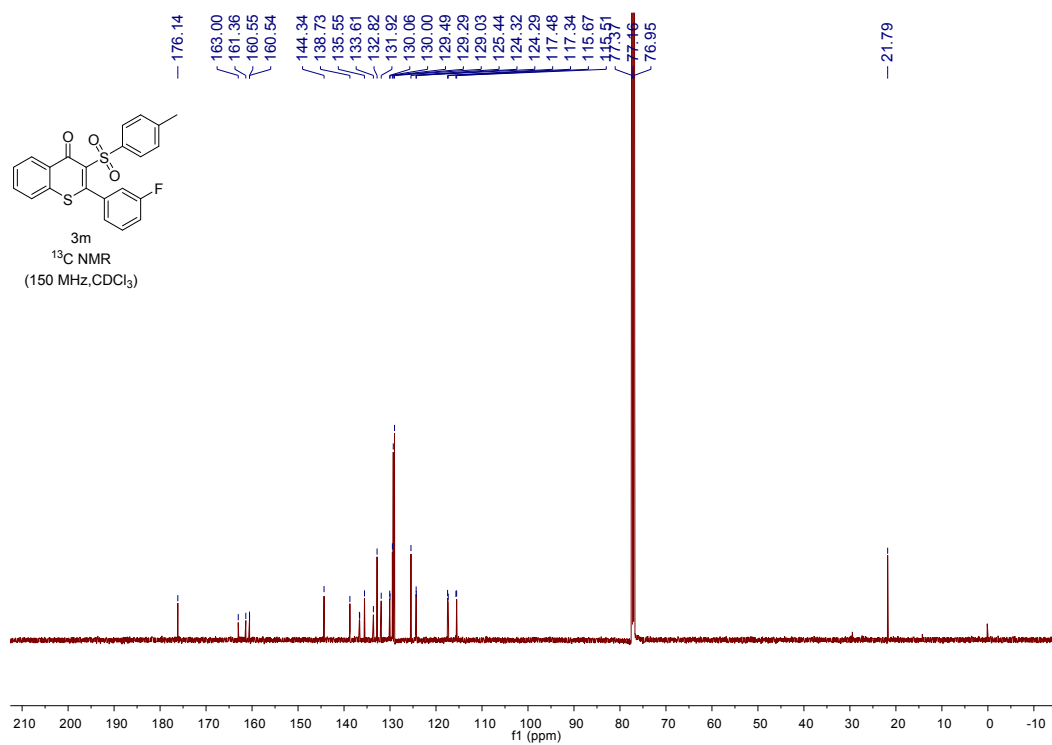

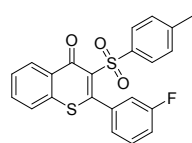

3m  
<sup>19</sup>F NMR  
 (564 MHz, CDCl<sub>3</sub>)

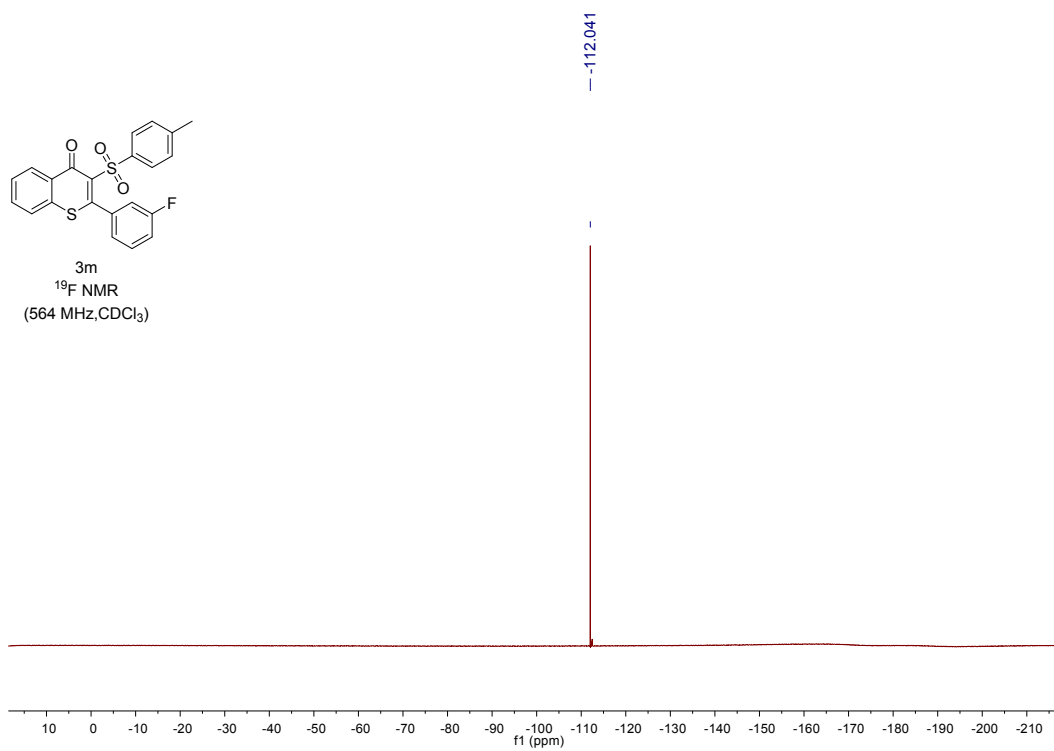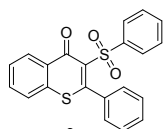

3n  
<sup>1</sup>H NMR  
 (400 MHz, CDCl<sub>3</sub>)

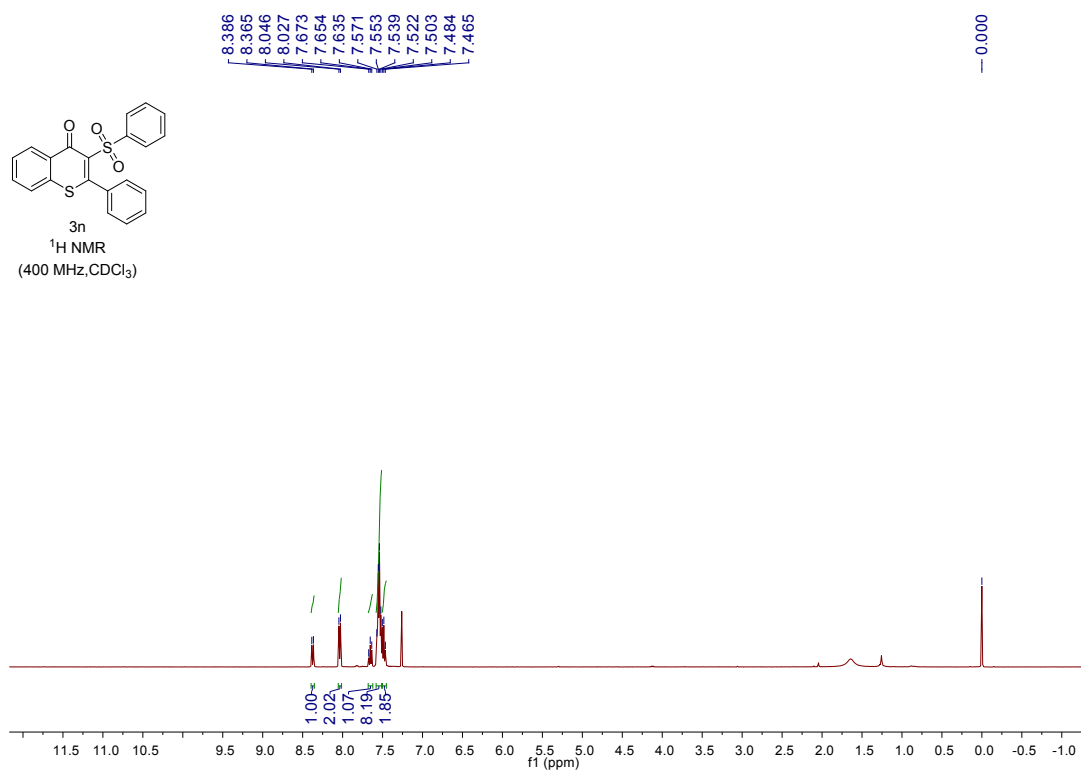

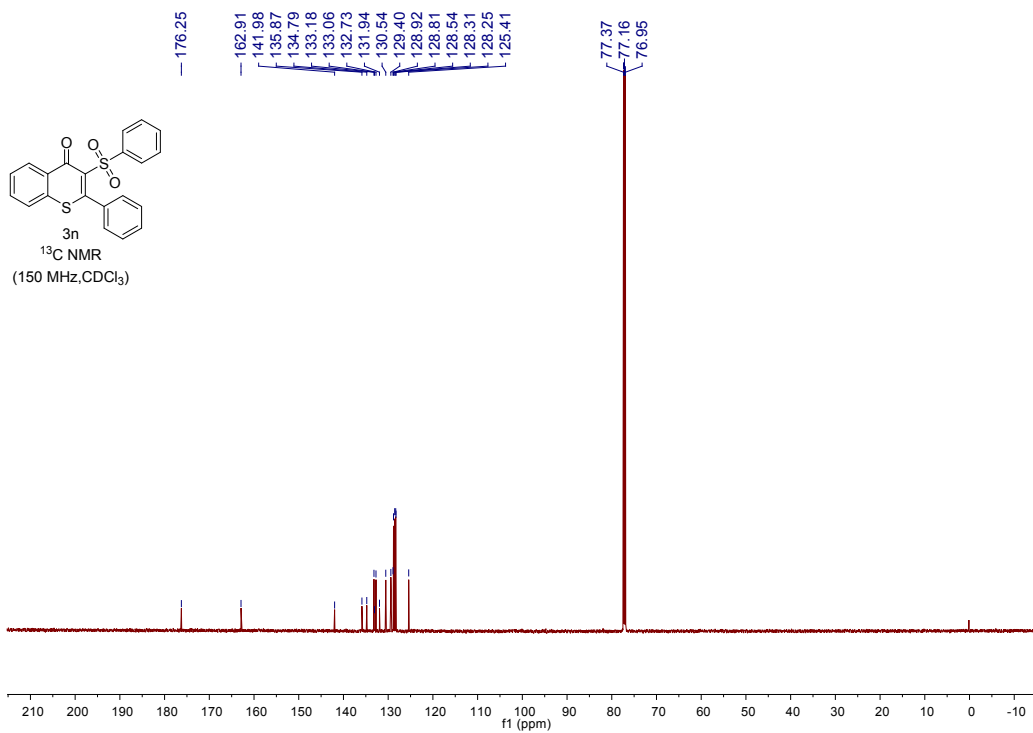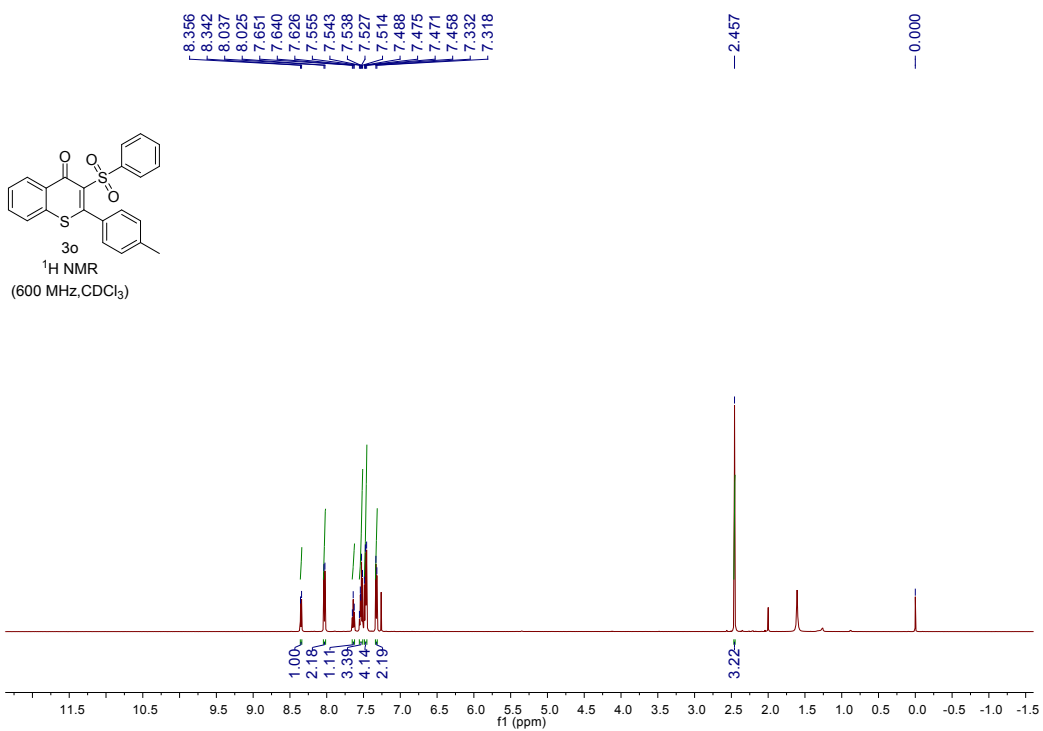

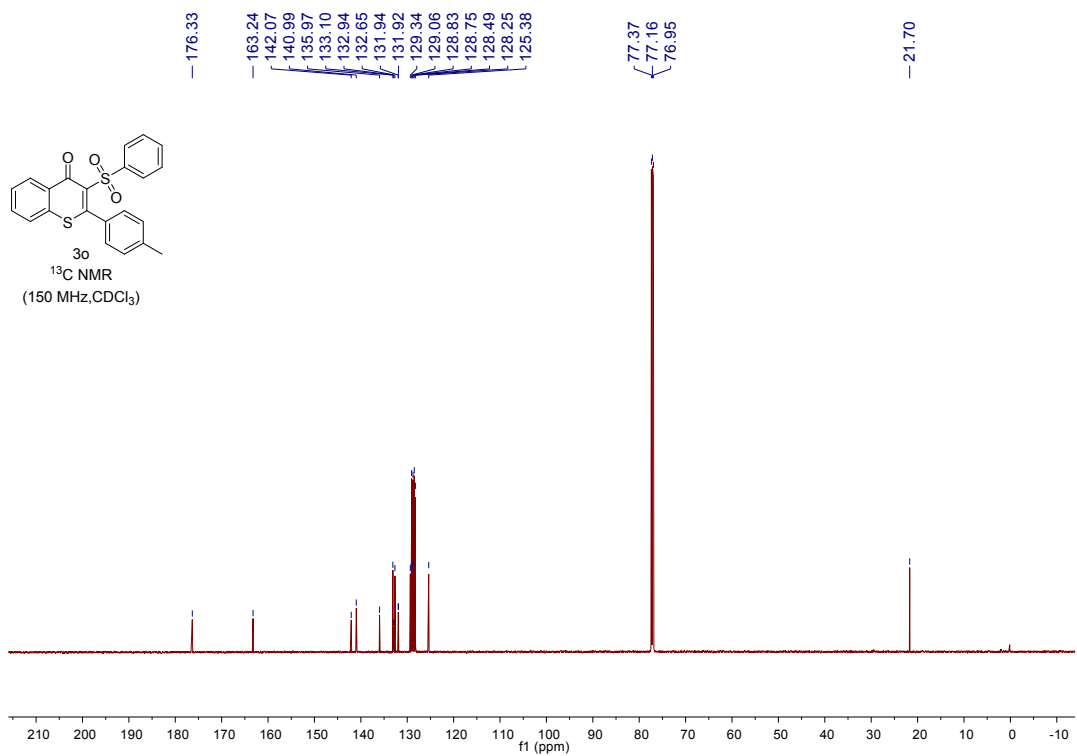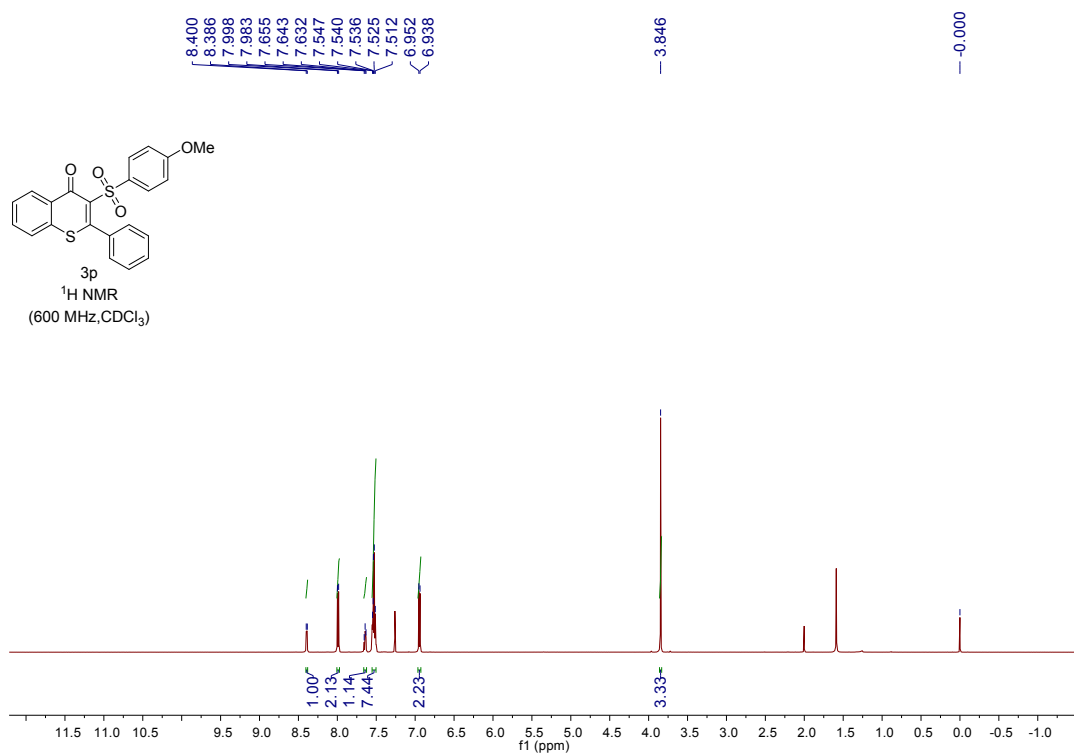



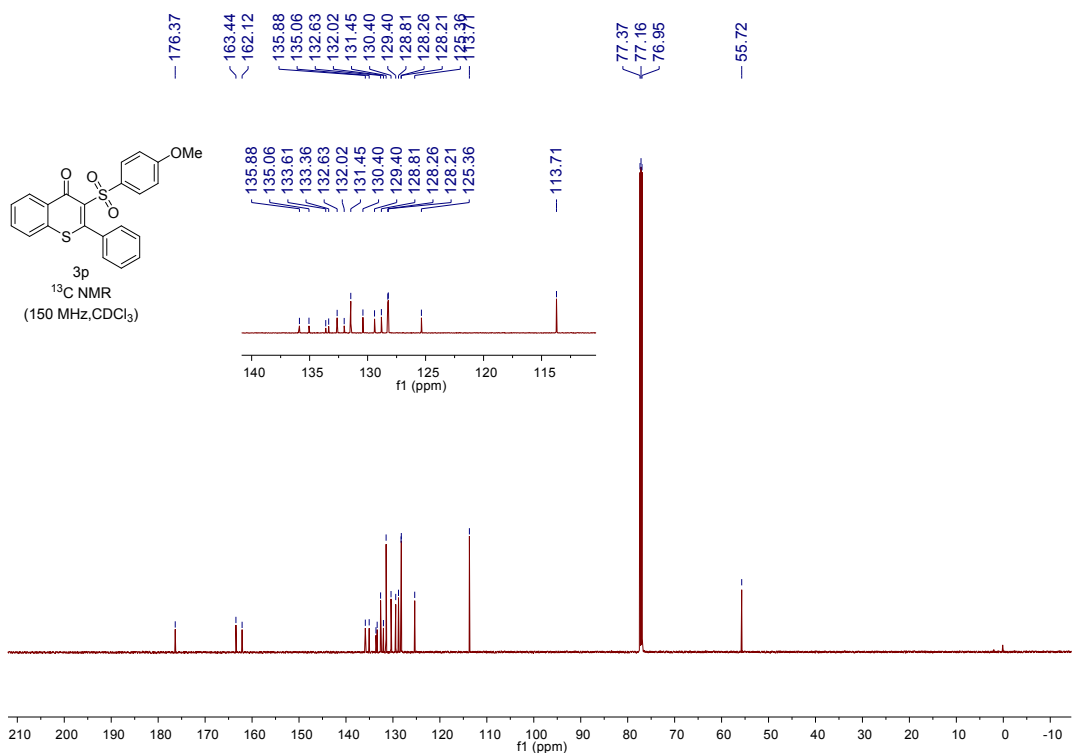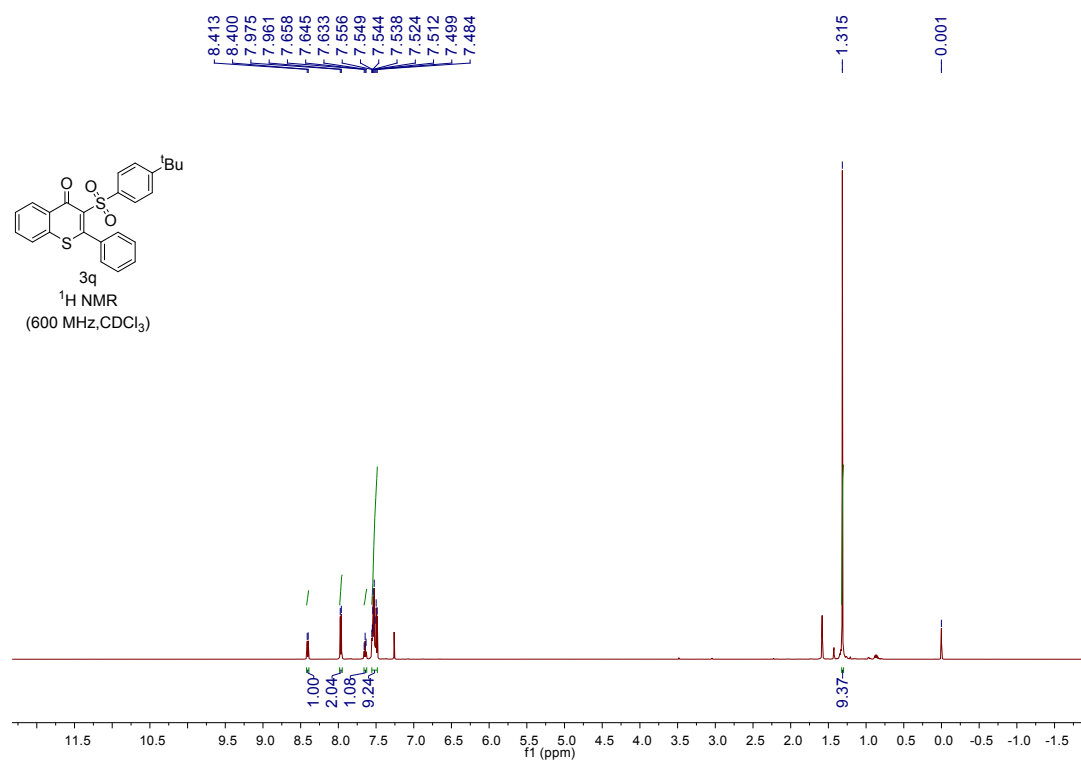

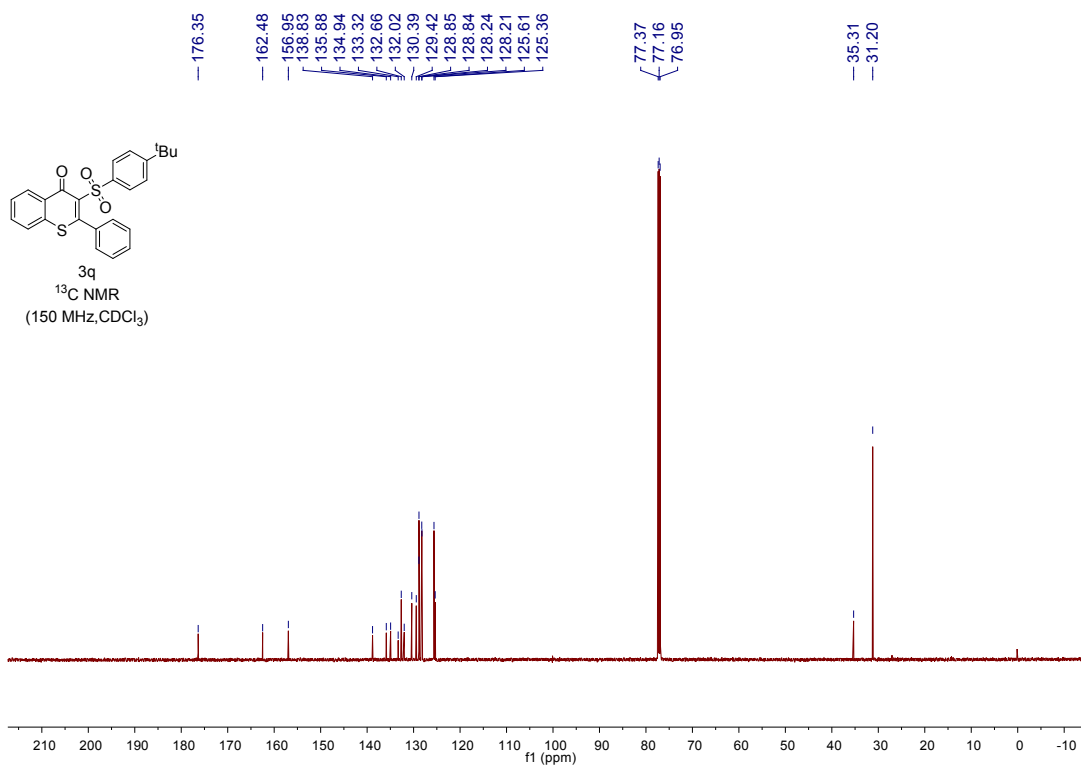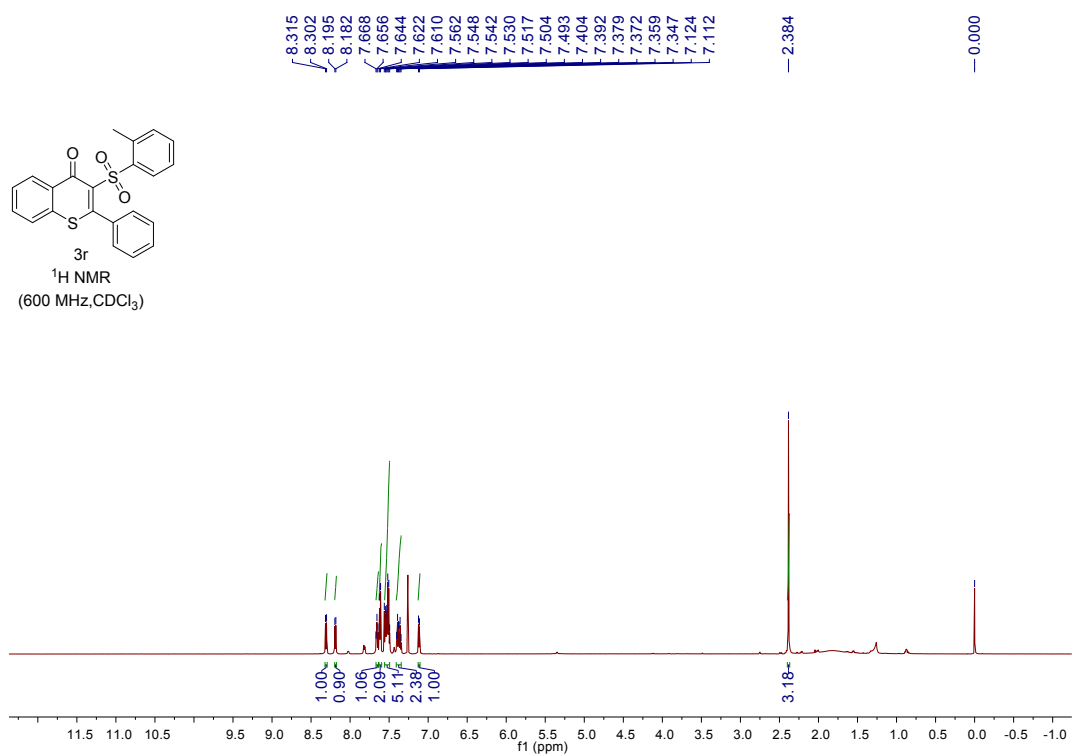

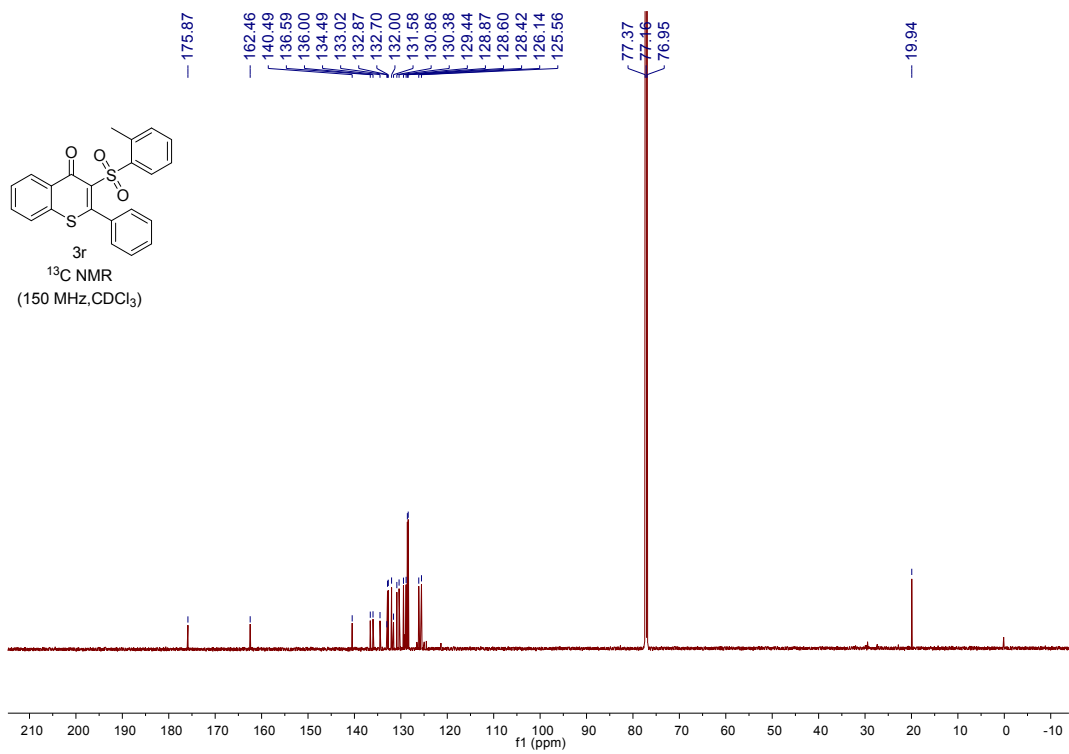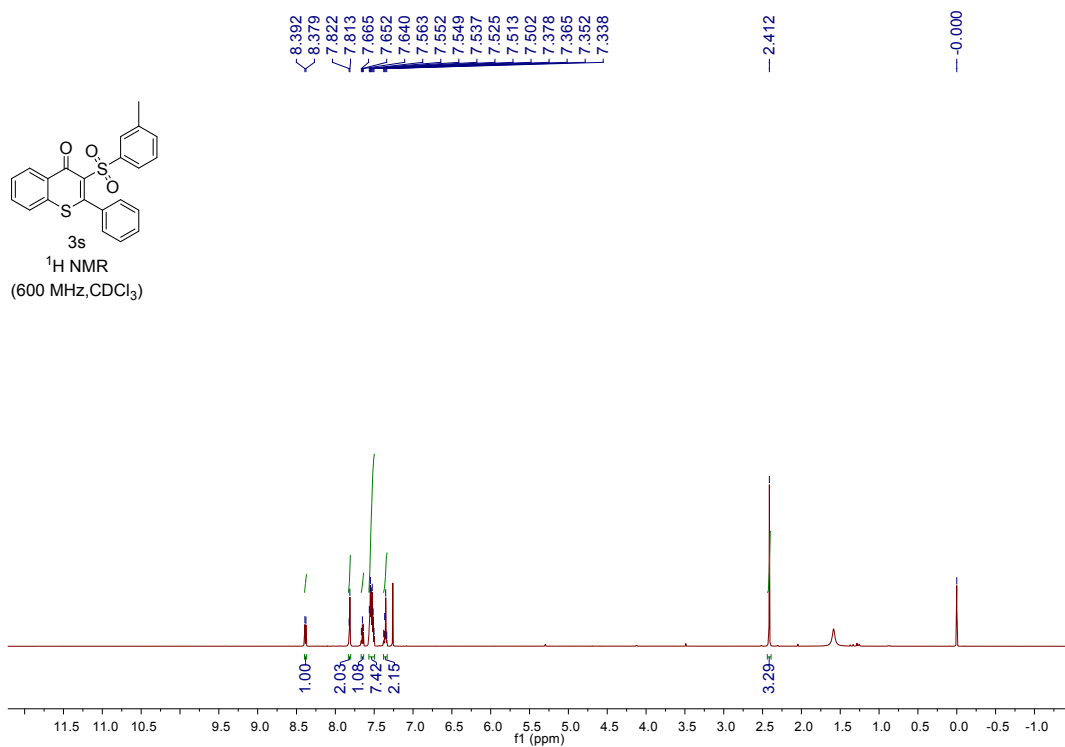

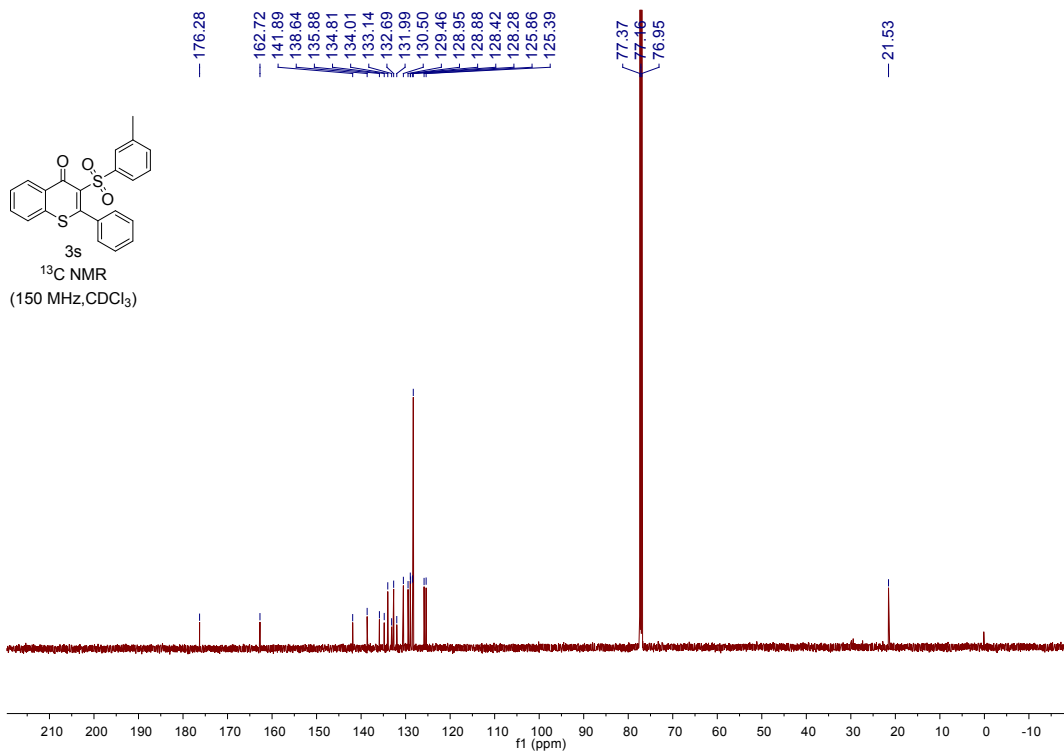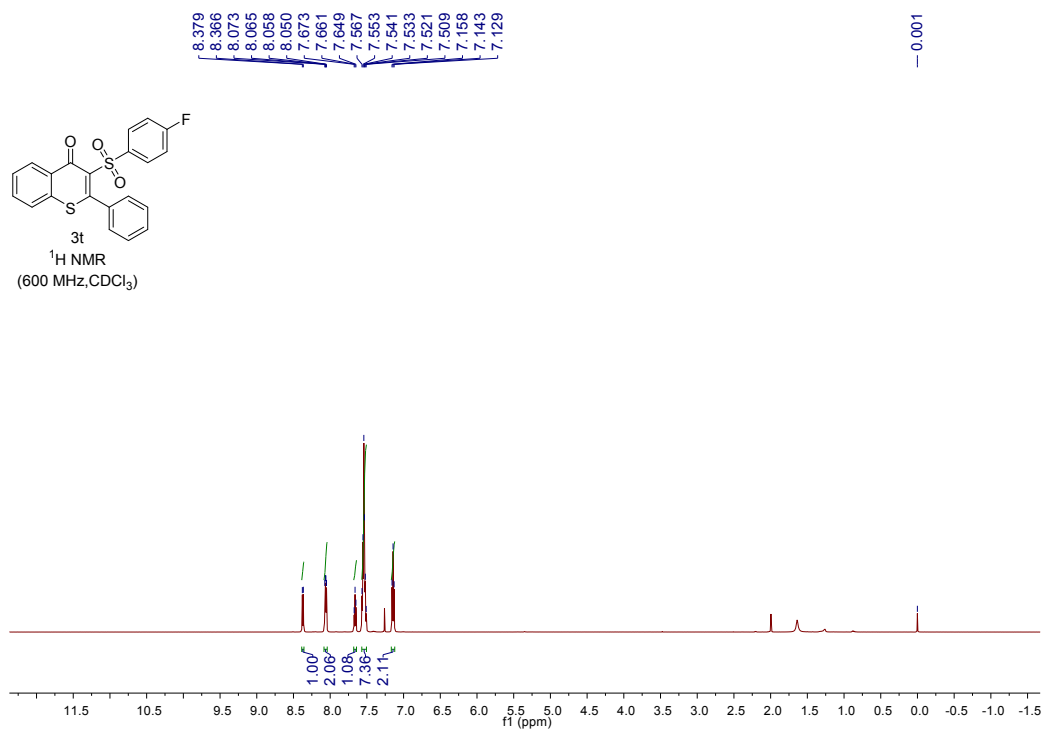

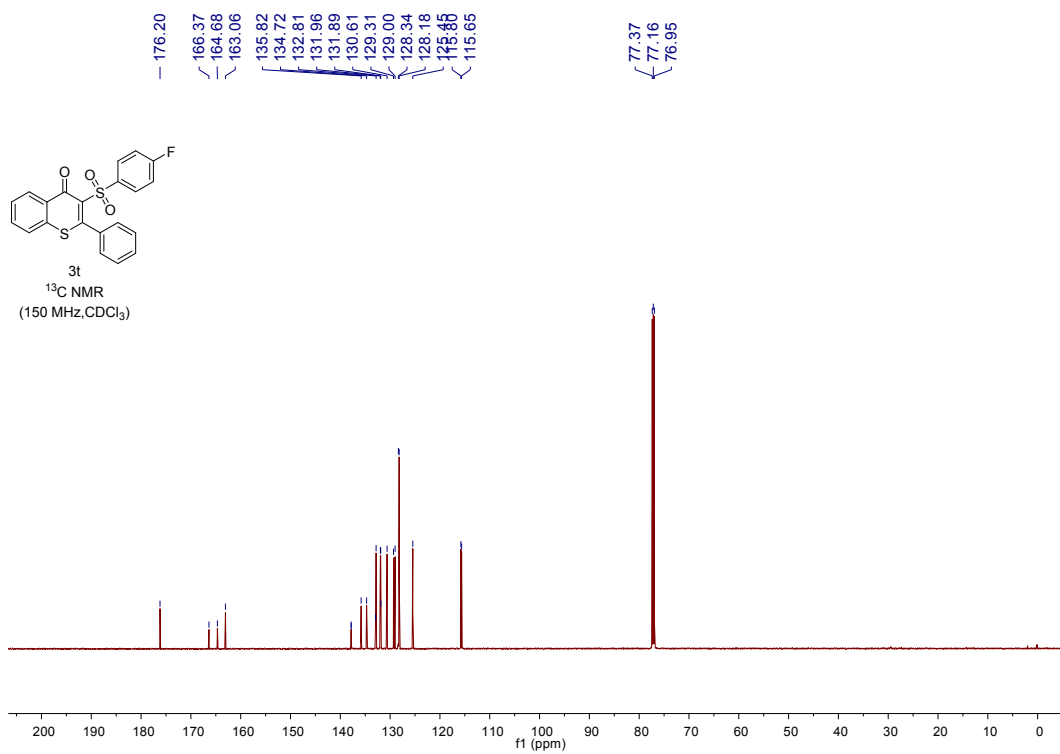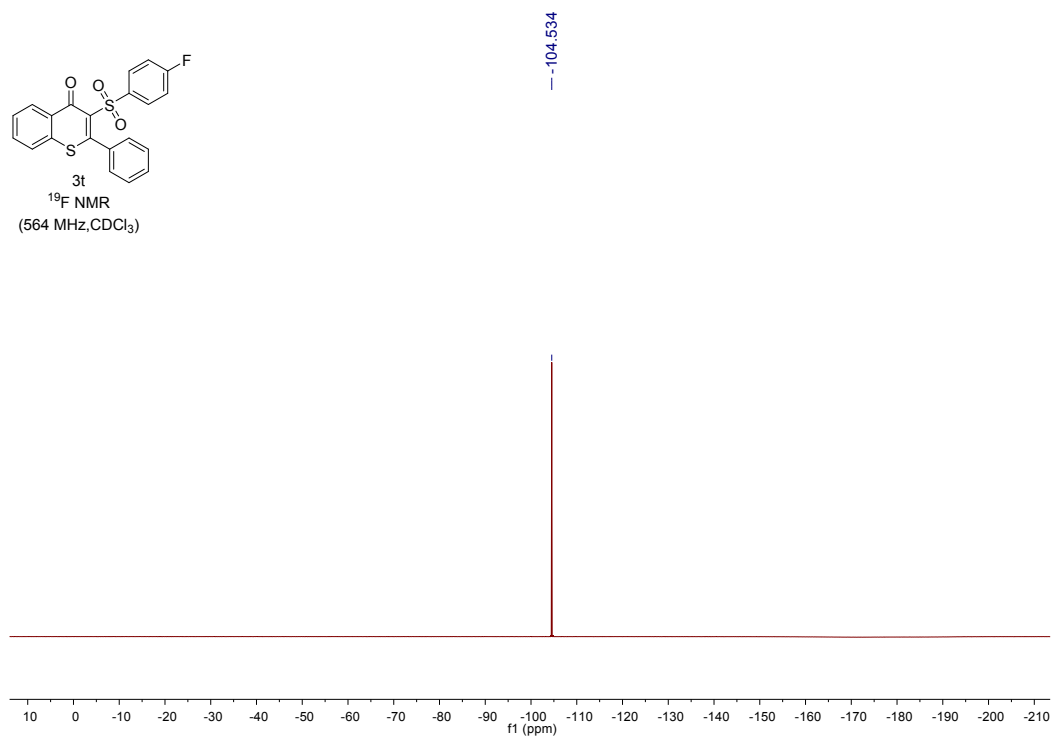

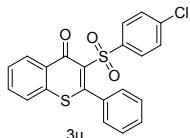

3u  
<sup>1</sup>H NMR  
 (400 MHz, CDCl<sub>3</sub>)

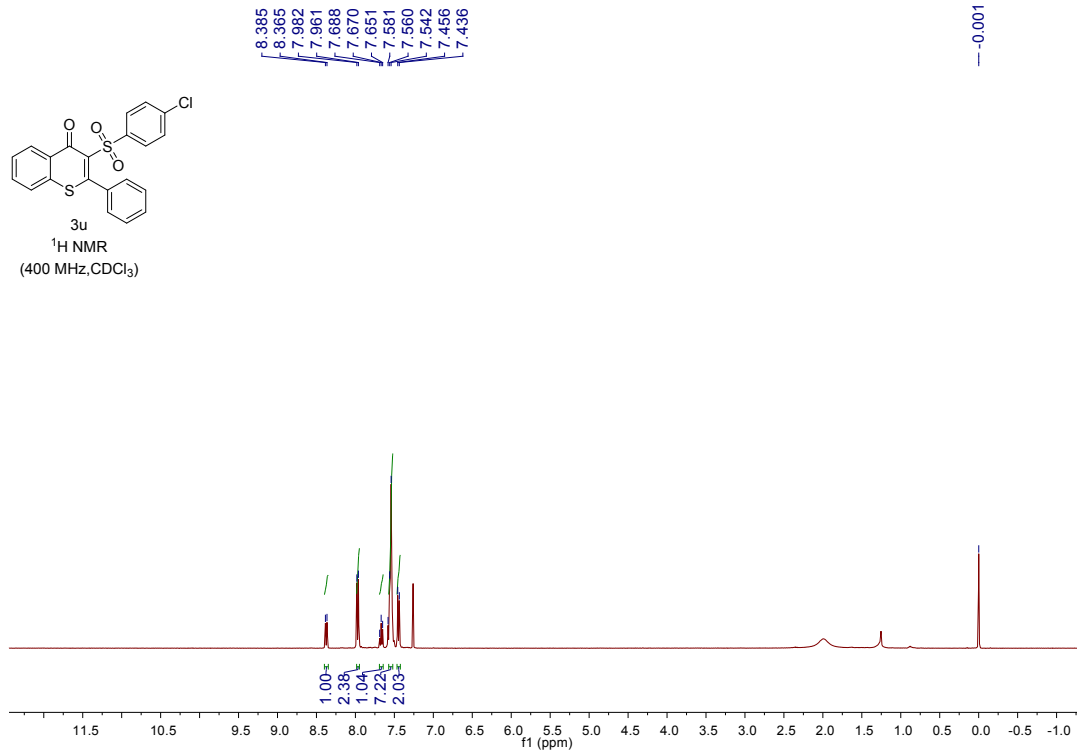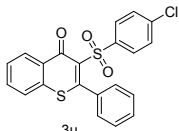

3u  
<sup>13</sup>C NMR  
 (150 MHz, CDCl<sub>3</sub>)

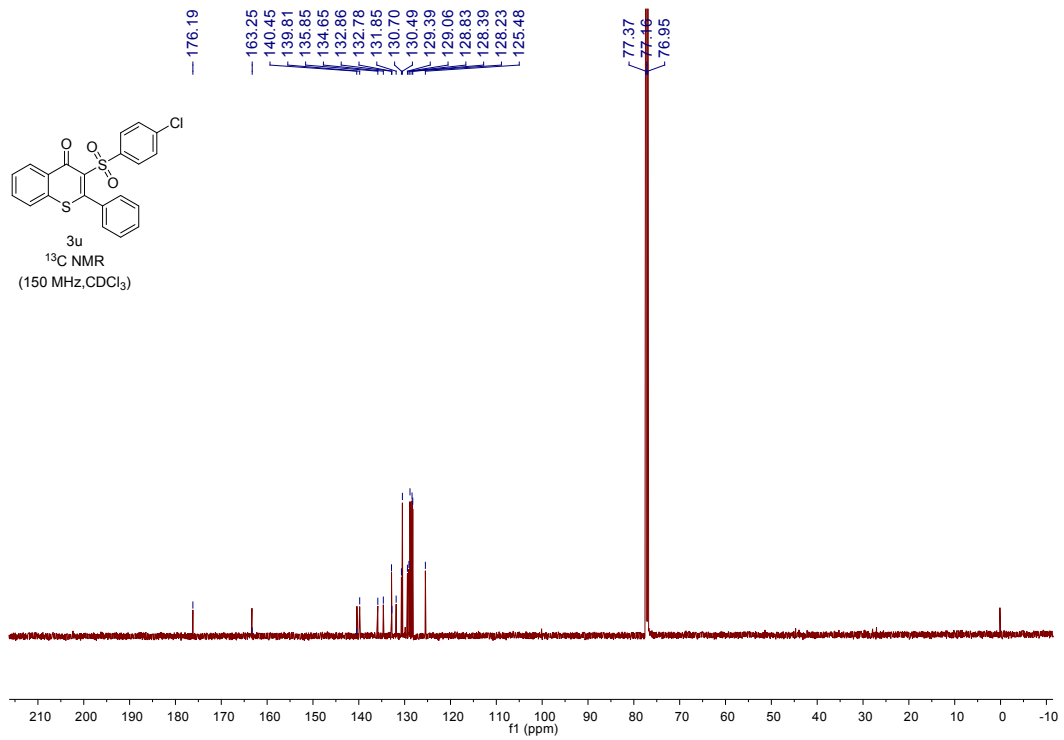

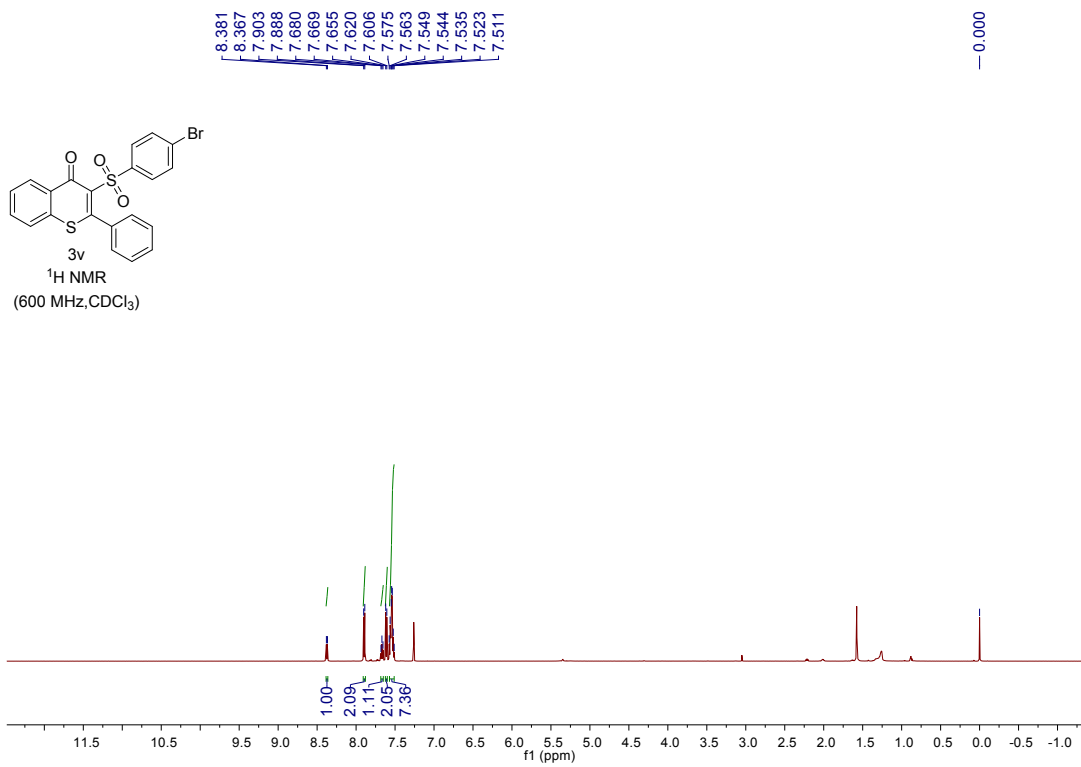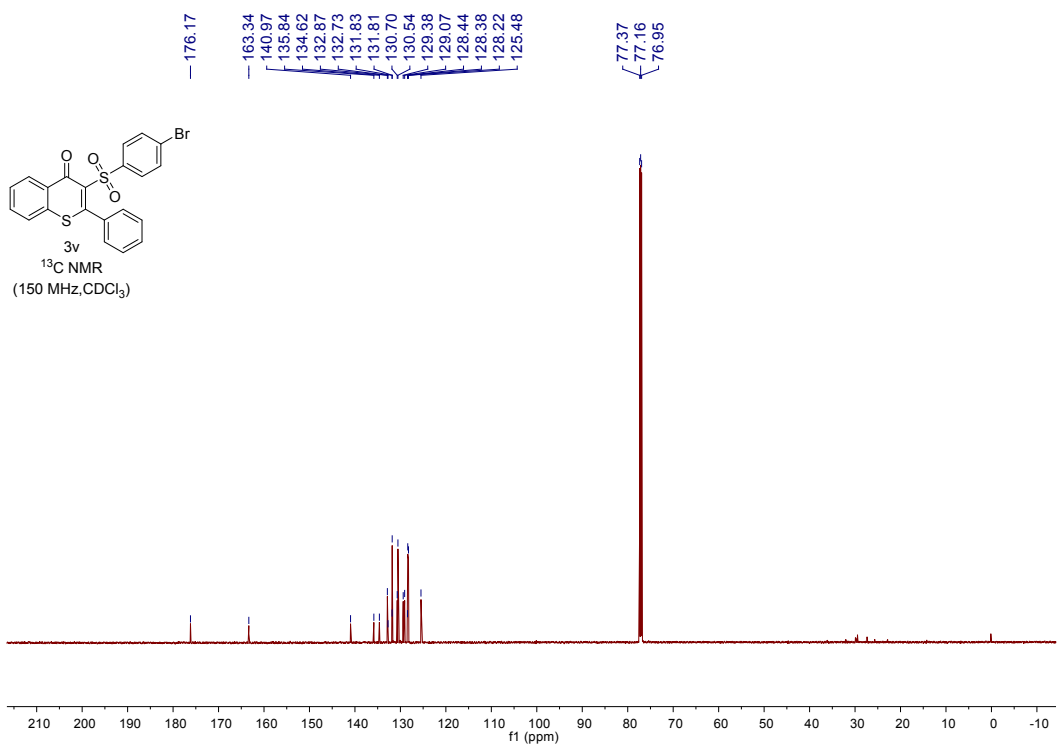

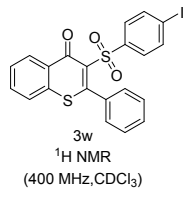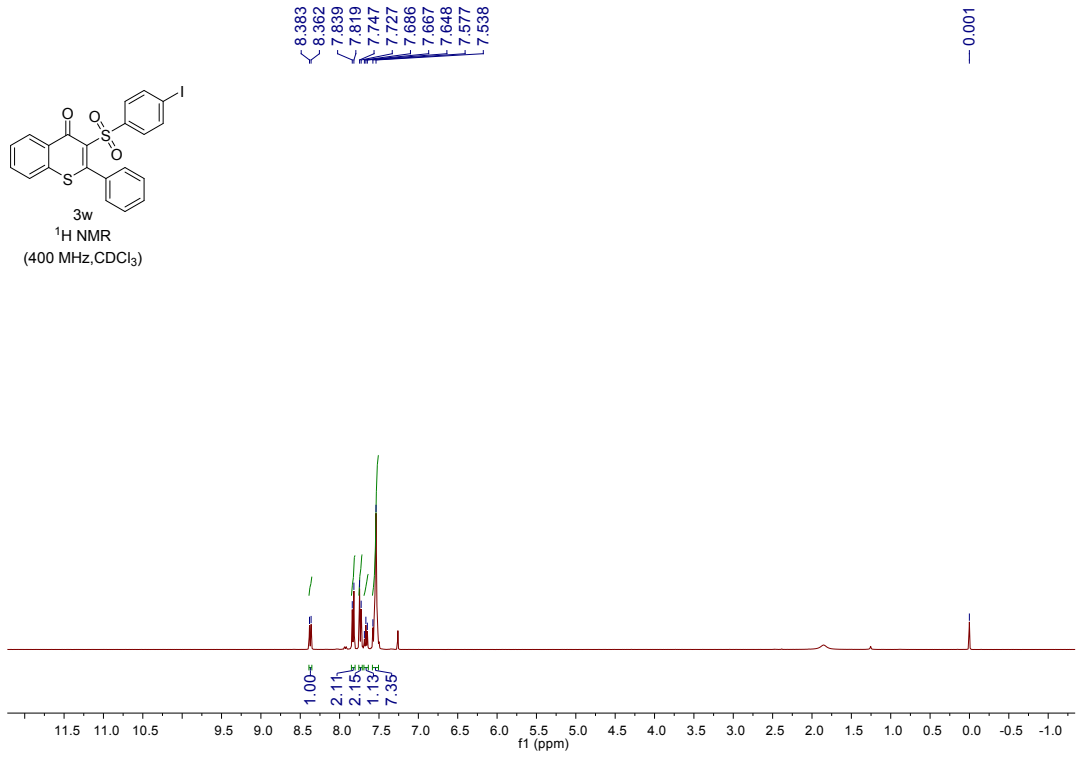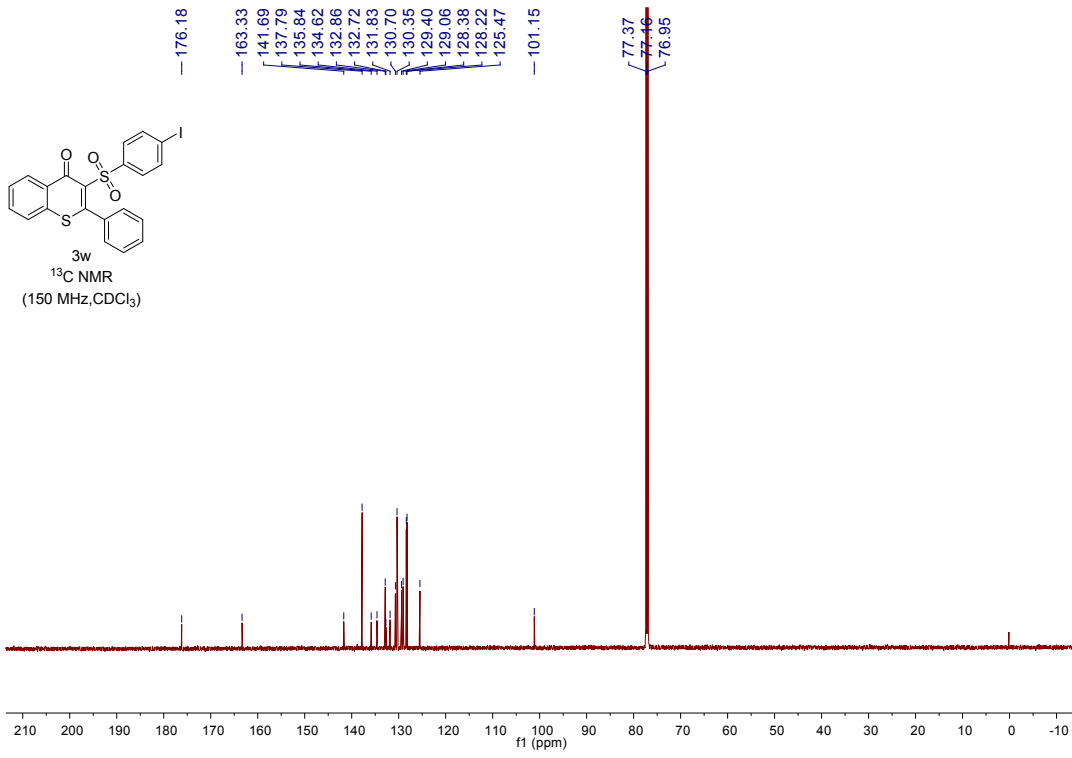



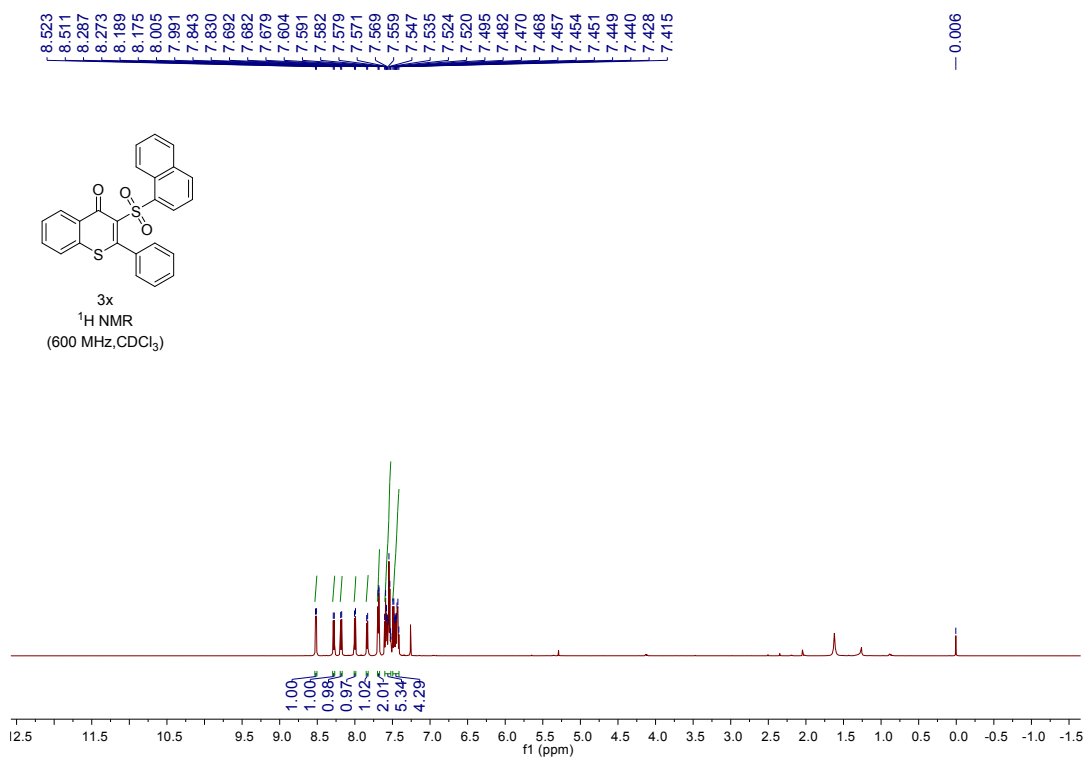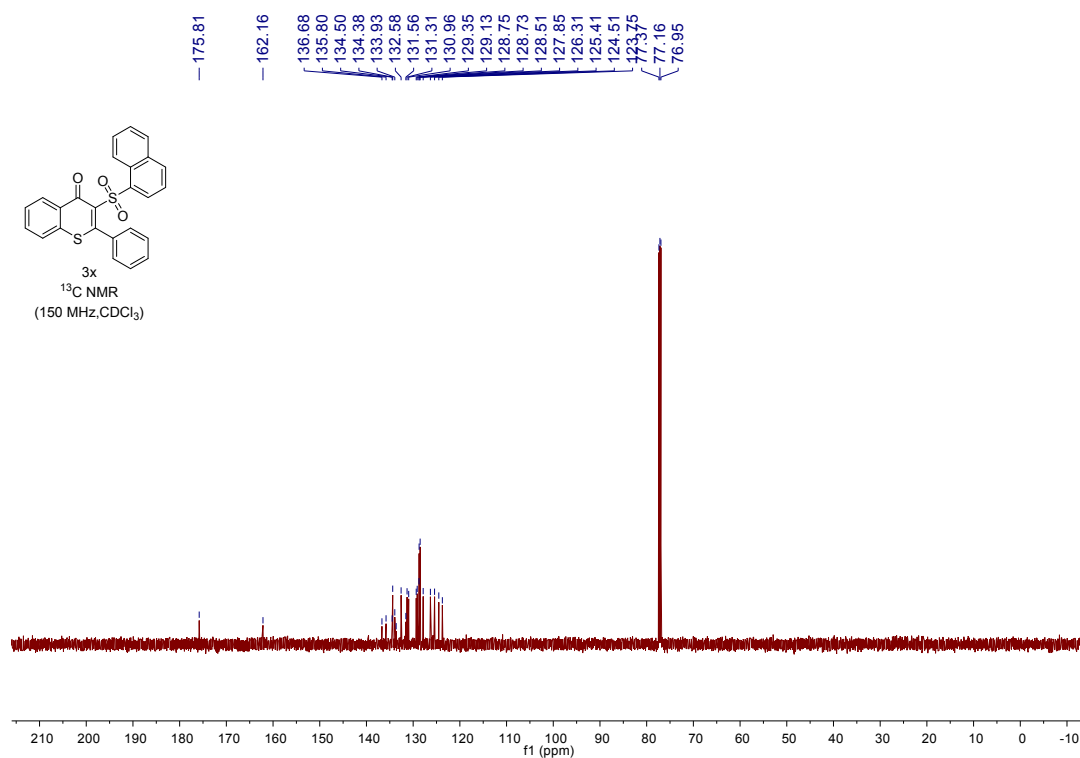



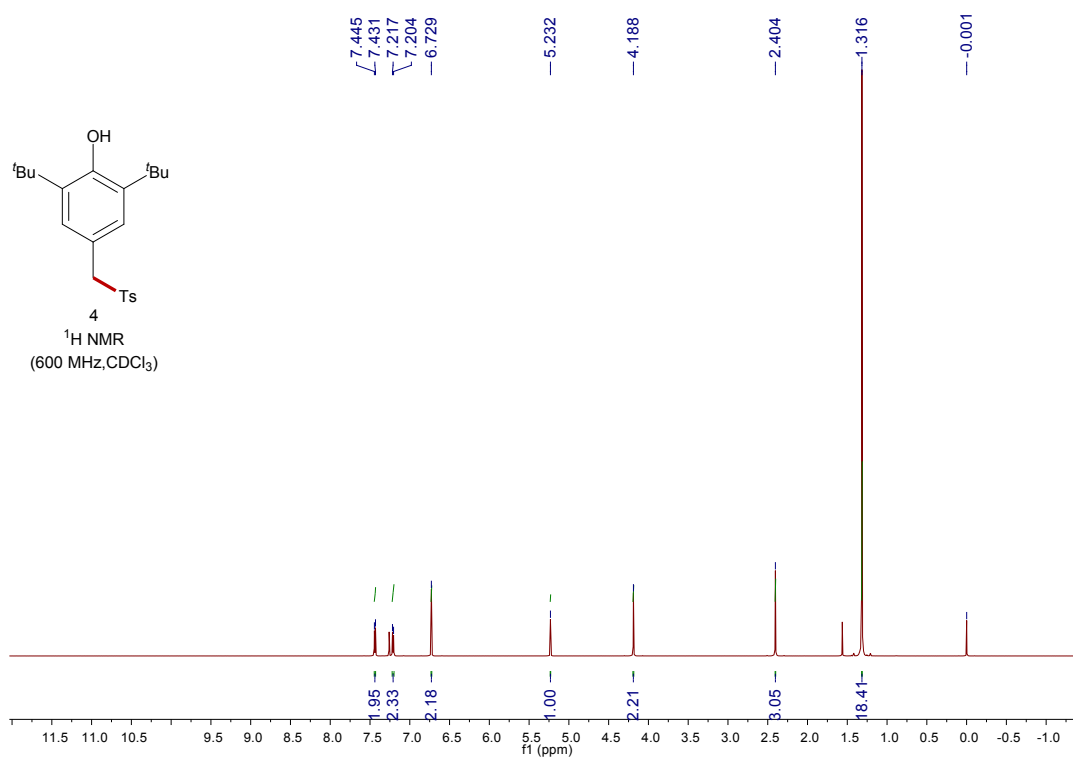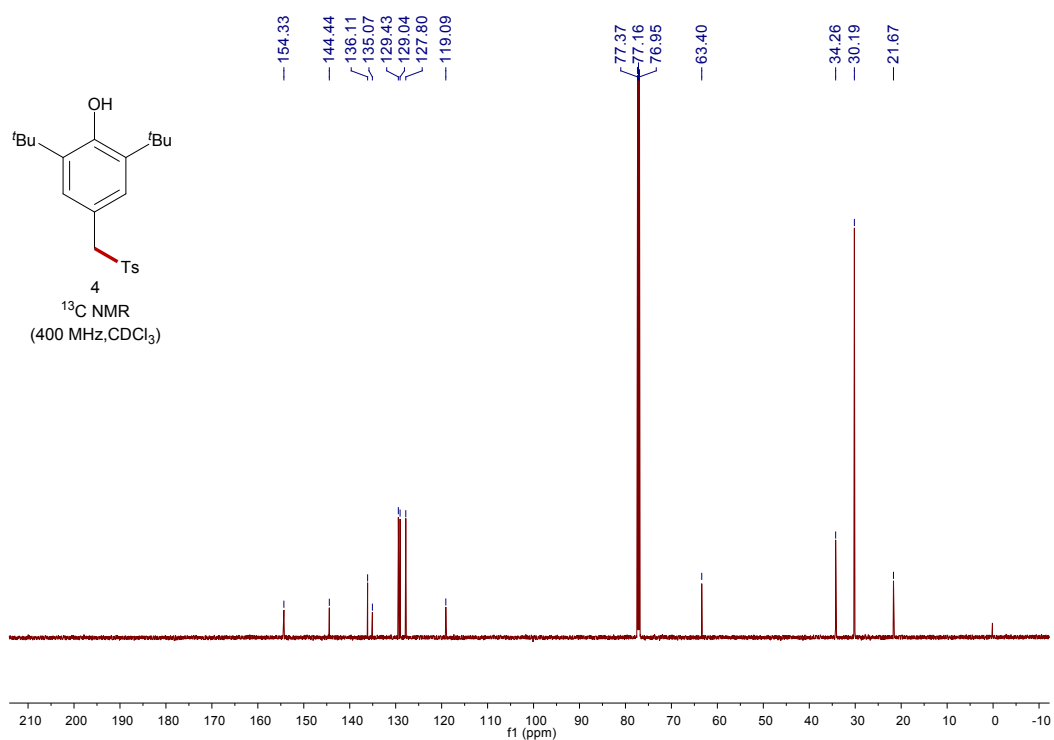

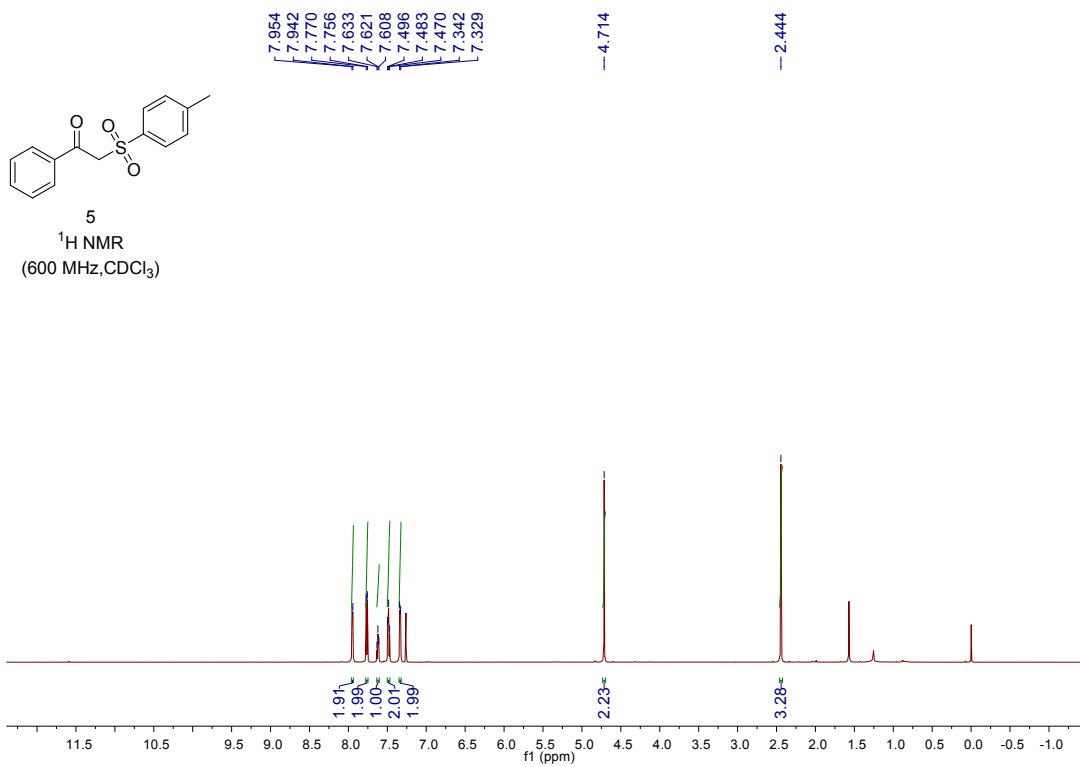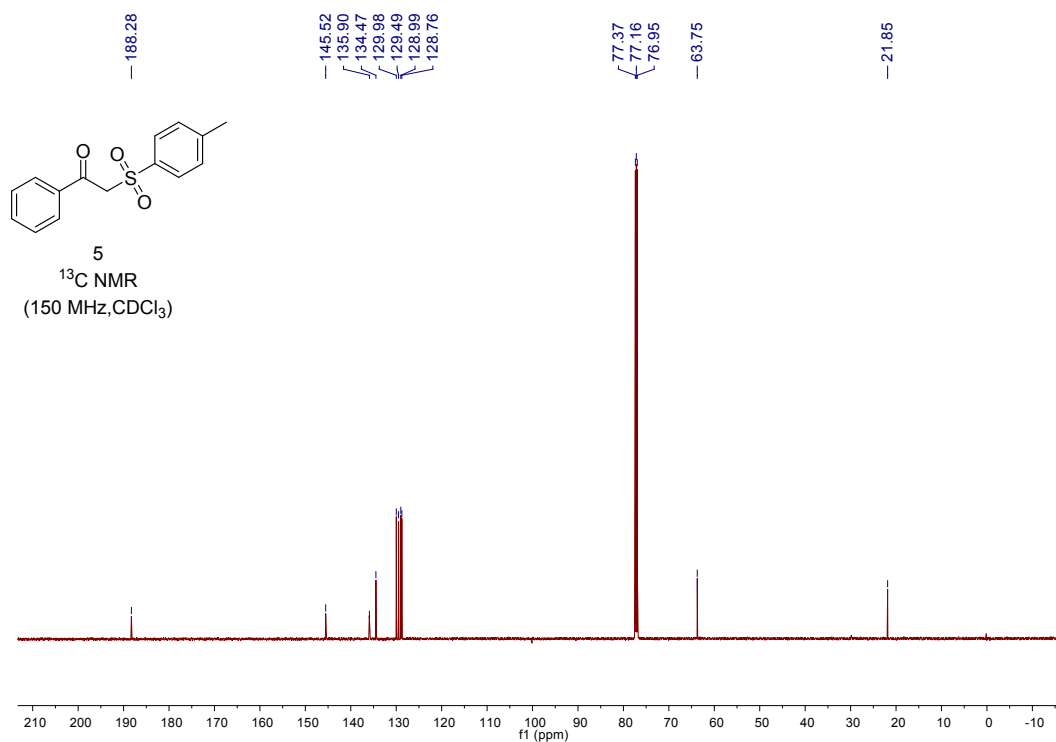

Table 1 Crystal data and structure refinement for **3a**.

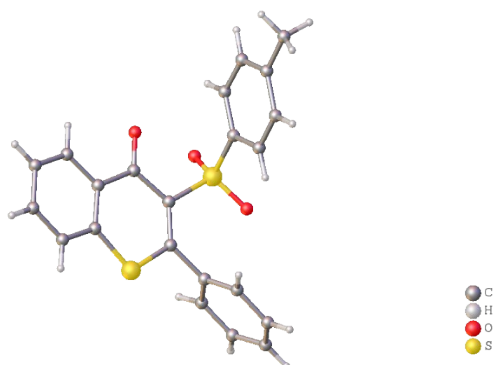

|                                             |                                                               |
|---------------------------------------------|---------------------------------------------------------------|
| Identification code                         | CCDC number: 1953609                                          |
| Empirical formula                           | C <sub>22</sub> H <sub>16</sub> O <sub>3</sub> S <sub>2</sub> |
| Formula weight                              | 392.47                                                        |
| Temperature/K                               | 295.5(3)                                                      |
| Crystal system                              | triclinic                                                     |
| Space group                                 | P-1                                                           |
| a/Å                                         | 5.3571(2)                                                     |
| b/Å                                         | 12.7753(6)                                                    |
| c/Å                                         | 13.8969(6)                                                    |
| α/°                                         | 74.461(4)                                                     |
| β/°                                         | 86.616(3)                                                     |
| γ/°                                         | 85.790(3)                                                     |
| Volume/Å <sup>3</sup>                       | 913.08(7)                                                     |
| Z                                           | 2                                                             |
| ρ <sub>calc</sub> /g/cm <sup>3</sup>        | 1.427                                                         |
| μ/mm <sup>-1</sup>                          | 2.813                                                         |
| F(000)                                      | 408.0                                                         |
| Crystal size/mm <sup>3</sup>                | 0.4 × 0.2 × 0.2                                               |
| Radiation                                   | CuKα (λ = 1.54184)                                            |
| 2θ range for data collection/°              | 7.194 to 124.964                                              |
| Index ranges                                | -6 ≤ h ≤ 4, -14 ≤ k ≤ 14, -15 ≤ l ≤ 15                        |
| Reflections collected                       | 7397                                                          |
| Independent reflections                     | 2919 [R <sub>int</sub> = 0.0279, R <sub>sigma</sub> = 0.0342] |
| Data/restraints/parameters                  | 2919/0/245                                                    |
| Goodness-of-fit on F <sup>2</sup>           | 1.065                                                         |
| Final R indexes [I ≥ 2σ (I)]                | R <sub>1</sub> = 0.0374, wR <sub>2</sub> = 0.1029             |
| Final R indexes [all data]                  | R <sub>1</sub> = 0.0420, wR <sub>2</sub> = 0.1055             |
| Largest diff. peak/hole / e Å <sup>-3</sup> | 0.22/-0.29                                                    |
